# Supplementary material for: Screening adsorbent–water adsorption heat pumps based on an experimental water adsorption isotherm database
Source: Royal Society of Chemistry journal article supplement (doi:10.1039/d0se01824d), 2021-01-01
Supplement: d0se01824d2.xlsx [file d0se01824d2.xlsx]

## Sheet: Table S1
Table S1. Fitting parameters of water adsorption isotherms using universal adsorption isotherm model.
Number	Adsorbent	Literature	Species	Tiso (K)	α1	ε1	m1	α2	ε2	m2	α3	ε3	m3	α4	ε4	m4	chi-square a)	reduced chi-square a)
Carb-1	293WVA 1100 oxidized	[85]	Carbon	293	0.549714	5855.92	1321.3	0.0526879	13311.5	146.986	0.397598	3608.27	226.454	n.p.	n.p.	n.p.	0.0178621	0.00061593
Carb-2	Activated Carbon AT400R1t75	[23]	Carbon	298	0.950067	1465.55	501.225	0.00205961	28874.2	76.9108	0.0478729	14845.1	56.0042	n.p.	n.p.	n.p.	0.00876819	0.00079711
Carb-3	Activated Carbon AT467R117t45	[23]	Carbon	298	0.919639	1159.78	416.942	0.00987843	34808.8	48.9235	0.0704823	22845.9	32.0693	n.p.	n.p.	n.p.	0.0127735	0.00127735
Carb-4	Activated Carbon AT600R1t30	[23]	Carbon	298	0.536994	2501.48	820.981	0.0626512	57989.9	88.97	0.00027236	9545.81	29.4038	0.400082	1191.11	355.538	0.00979698	0.00044532
Carb-5	Activated Carbon AT800R15t120	[23]	Carbon	298	0.47244	1101.54	326.544	0.468179	2751.32	760.198	0.0593809	12480.2	27.3176	n.p.	n.p.	n.p.	0.00544336	0.00060482
Carb-6	Activated PVDC Carbon S850	[20]	Carbon	293	0.92779	1635.23	363.211	0.00111113	35879.6	60.4799	0.071099	16626.9	53.2787	n.p.	n.p.	n.p.	0.00563536	0.00112707
Carb-7	BD-Carbon	[119]	Carbon	298	0.55835	1259.12	254.007	0.0232751	57920.1	106.996	0.0508319	3994.29	373.402	0.367543	979.21	15.3687	0.00323474	0.00323474
Carb-8	BPL-Carbon	[119]	Carbon	298	0.502296	1428.58	207.663	0.476274	1054.57	163.148	0.0214303	25445.9	7109.16	n.p.	n.p.	n.p.	0.00308993	0.00044142
Carb-9	Carbon	[42]	Carbon	298	0.807272	1382.06	477.994	0.0265945	48482.6	68.0035	0.00388402	20978.8	451.061	0.162249	297.299	13.0528	0.0147619	0.00067099
Carb-10	Carbon AG5	[43]	Carbon	298	0.620695	804.37	248.35	0.180133	3025.87	548.632	0.199172	1391.73	63.8282	n.p.	n.p.	n.p.	0.00447917	0.00111979
Carb-11	Carbon AG5-H2O2	[43]	Carbon	298	0.936134	1252.78	441.909	0.000447883	42096.4	79.5964	0.0634185	25965.2	45.7945	n.p.	n.p.	n.p.	0.0174726	0.00218408
Carb-12	Carbon AG5-HClO4	[43]	Carbon	298	0.504616	1072.45	272.197	0.0152052	880.446	302.788	0.480179	1946.22	675.016	n.p.	n.p.	n.p.	0.00645284	0.00107547
Carb-13	Carbon AG5-HNO3	[43]	Carbon	298	0.941131	1523.51	490.886	0.031316	33740.9	90.7809	0.0275526	22660	47.2369	n.p.	n.p.	n.p.	0.00700206	0.00233402
Carb-14	Carbon AG5-HNO3 (356K)	[43]	Carbon	298	0.297691	3489.91	318.315	0.0417565	77169.8	108.458	0.170516	6739.17	63.2657	0.490037	721.266	306.239	0.0172524	0.00345047
Carb-15	Carbon Molecular Sieve	[79]	Carbon	293	0.940976	2161.67	370.592	0.0515862	40168.5	122.859	0.00743785	18489.6	41.8609	n.p.	n.p.	n.p.	0.0144609	0.00065731
Carb-16	Carbon WD	[43]	Carbon	298	0.491191	524.634	42.1263	0.0364397	235923	332.262	0.472369	1036	324.226	n.p.	n.p.	n.p.	0.00173819	0.00034764
Carb-17	Carbon WD-H2O2	[43]	Carbon	298	0.613458	1237.4	471.584	0.0303388	23984.3	74.5517	0.356203	627.825	43.3663	n.p.	n.p.	n.p.	0.0071287	0.00101839
Carb-18	Carbon WD-HClO4	[43]	Carbon	298	0.946719	1023.98	386.577	0.00116179	44911.3	82.0754	0.0521197	20274.1	46.2435	n.p.	n.p.	n.p.	0.0331056	0.00662112
Carb-19	Carbon WD-HNO3 (356K)	[43]	Carbon	298	0.493081	891.512	365.649	0.333855	4276.59	564.317	0.173063	12115	16.805	n.p.	n.p.	n.p.	0.0156747	0.00195934
Carb-20	Charcoal	[122]	Carbon	293	0.670014	1189.11	279.364	0.148795	2383.76	169.157	0.181191	3464.71	722.799	n.p.	n.p.	n.p.	0.0069408	0.0004338
Carb-21	Coal based steam activated carbon	[22]	Carbon	298	0.387038	2572.59	121.772	0.230773	6387.92	1326.25	0.382189	3283.97	319.241	n.p.	n.p.	n.p.	0.00806501	0.00050406
Carb-22	Coconut based steam activated carbon	[22]	Carbon	298	0.528089	3015.08	275.382	0.23157	6187.92	1255.21	0.240341	2523.59	61.0697	n.p.	n.p.	n.p.	0.00870132	0.00054383
Carb-23	Eucalyptus Charcoal	[38]	Carbon	298	0.520105	2592.13	749.013	0.0725059	463.806	42.1276	0.0519105	29170	9135.63	0.355478	34.584	7.19121	0.0171713	0.00429282
Carb-24	Eucalyptus Charcoal heated to 1273K	[38]	Carbon	298	0.899948	1654.22	501.257	0.00117058	36816.9	76.794	0.098881	11516	41.8154	n.p.	n.p.	n.p.	0.00723816	0.00241272
Carb-25	Holm-Oak Charcoal	[38]	Carbon	298	0.317974	103.013	74.5511	0.0329397	52122.5	73.397	0.649087	2694.45	1156.4	n.p.	n.p.	n.p.	0.0309767	0.00774418
Carb-26	Holm-Oak Charcoal heated to 1023K	[38]	Carbon	298	0.629882	33.6528	114.702	0.0248264	100376	141.388	0.345292	2315.38	961.589	n.p.	n.p.	n.p.	0.171401	0.0428502
Carb-27	MWCNT	[121]	Carbon	298	0.500785	943.772	514.419	0.299495	9769.6	29.6142	0.19972	3997.52	813.286	n.p.	n.p.	n.p.	0.0147323	0.00105231
Carb-28	NPC E0	[25]	Carbon	298	0.759902	340.74	151.253	0.165489	5419.48	1415.78	0.0746083	1783.01	326.961	n.p.	n.p.	n.p.	0.0591686	0.00422633
Carb-29	NPC E1	[25]	Carbon	298	0.497586	1573.58	568.268	0.0452429	118572	166.799	0.457171	309.732	49.8091	n.p.	n.p.	n.p.	0.0115853	0.00289631
Carb-30	PCB-Carbon	[119]	Carbon	298	0.956275	1696.68	377.719	0.000313025	36995.9	104.864	0.0434121	19954.9	51.5663	n.p.	n.p.	n.p.	0.00825455	0.00206364
Carb-31	Sonicated Fenton MWCNT	[121]	Carbon	298	0.392742	983.194	432.746	0.201565	65656.9	92.4542	0.405693	4205.75	1298.15	n.p.	n.p.	n.p.	0.00756695	0.00050446
Carb-32	Sorbonorit 4 Activated Carbon	[75]	Carbon	293	0.637958	1656.23	388.048	0.0662591	5585.58	2051.03	0.295783	889.219	28.7228	n.p.	n.p.	n.p.	0.00095627	7.356e-05
Carb-33	Wood based phosphoric acid activated carbon	[22]	Carbon	298	0.566416	3769.14	521.427	0.0288195	39157.6	82.5953	0.283744	9580.24	1901.82	0.12102	3055.71	24.0309	0.0261951	0.00093554
Carb-34	WVA 1100	[85]	Carbon	293	0.500103	3269.74	306.565	0.119773	27061.6	75.8621	0.380124	5985.72	1002.16	n.p.	n.p.	n.p.	0.0177518	0.00071007
Carb-35	Xtrusorb	[85]	Carbon	298	0.42995	3480.44	194.014	0.0509093	25537.8	69.5579	0.519141	5454.53	1069.2	n.p.	n.p.	n.p.	0.022366	0.00077124
Carb-36	Xtrusorb oxidized	[85]	Carbon	298	0.562394	3310.75	316.239	0.239555	6090.95	1337.15	0.198051	2770.76	44.4395	n.p.	n.p.	n.p.	0.0156991	0.00037379
Comp-1	GOC16Si-1-823	[29]	Composite-carbon/silica composite	298	0.869457	1390.56	639.707	0.109244	30855.4	173.848	0.0212985	19157.4	81.8607	n.p.	n.p.	n.p.	0.0657709	0.00548091
Comp-2	GOC16Si-22-823	[29]	Composite-carbon/silica composite	298	0.281777	2636.54	781.339	0.00382918	64500.4	90.4755	0.0650105	7351.11	116.168	0.649383	997.85	281.302	0.00864345	0.00041159
Comp-3	GOC16Si-6-823	[29]	Composite-carbon/silica composite	298	0.683488	1071.9	300.76	0.26534	3259.45	929.38	0.051172	26784.3	92.3102	n.p.	n.p.	n.p.	0.00765024	0.00040264
Comp-4	C24H39N4O60Ni2PW12	[34]	Composite-POM/MOF composite	298	0.433927	1473.65	404.826	0.0571025	3987.24	135.502	0.016219	10854.5	40.093	0.492752	442.519	121.432	0.00415131	0.00031933
Comp-5	Carbonized Fiber PCF	[110]	Composite-RGO/carbon composite	293	0.972428	1915.88	362.471	7.1486e-05	19760.3	140.488	0.0275009	6557.36	42.044	n.p.	n.p.	n.p.	0.039761	0.00198805
Comp-6	Carbonized Fiber PCGF-H	[110]	Composite-RGO/carbon composite	293	0.986553	1258.07	243.984	2.4847e-05	25519.1	108.514	0.0134224	18497.7	73.1726	n.p.	n.p.	n.p.	0.0145407	0.00103862
Comp-7	Carbonized Fiber PCGF-N	[110]	Composite-RGO/carbon composite	293	0.953616	1859.78	338.62	0.016052	38582.5	85.9088	0.0303318	4356.49	58.5887	n.p.	n.p.	n.p.	0.0265375	0.00120625
M-1	(H2dab)[Zn2(ox)3]	[70]	MOF	298	0.306957	8766.32	1603.35	0.0499207	86008.9	232.158	0.643123	808.809	92.0018	n.p.	n.p.	n.p.	0.0112379	0.00028095
M-2	[{Zn(L)(H2O)2}(NO3)2*2H2O]n	[4]	MOF	298	0.529148	632.72	304.936	0.0711391	134040	188.764	0.399713	2344.22	269.088	n.p.	n.p.	n.p.	0.015837	0.0010558
M-3	[Cd(mpto)2.CH3CH2OH]n	[24]	MOF	298	0.724523	1262.19	415.905	0.0668207	12612.6	72.4416	0.101728	6290.44	2389.58	0.106929	377.672	11.0895	0.00814221	0.00067852
M-4	[Co2(BDC)2(BPNO)]*H2BDC*2MeOH	[19]	MOF	298	0.474072	2088.64	922.832	0.194662	8090.4	282.969	0.331267	40125.3	56.1227	n.p.	n.p.	n.p.	0.00890499	0.0008905
M-5	[Co3(ndc)-(HCOO)3(mu3-OH)(H2O)]n	[15]	MOF	298	0.761352	3580	1377.18	0.0225893	96918	136.174	0.216059	4368.73	137.15	n.p.	n.p.	n.p.	0.0109619	0.00219239
M-6	[Cu(INA)2(NH3)2(H2O)2]	[35]	MOF	298	0.489439	3282.77	1241.3	0.0322918	61855.7	245.836	0.478269	568.985	254.18	n.p.	n.p.	n.p.	0.0119036	0.00148795
M-7	[Cu(INA)2]	[35]	MOF	298	0.603043	1268.97	462.273	0.0329952	43842	4588.57	0.363962	4623.37	1319.48	n.p.	n.p.	n.p.	0.00382629	0.00047829
M-8	[Cu(INAIP)]*2H2O	[92]	MOF	298	0.097606	1781.13	351.696	0.0576773	39944.8	119.948	0.139359	7482.87	64.7509	0.705358	6528.92	305.702	0.00590947	0.00147737
M-9	[Cu2(H2btp)(H2O)2(12-bis(4-pyridl)ethylene)]	[114]	MOF	303	0.601994	5669.69	1779.88	3.20497e-06	41146.5	57.8269	0.0108129	7723.95	75.9021	0.38719	1698.32	613.726	0.00598502	0.000285
M-10	[Cu2(H2btp)(H2O)2(13-bis(4-pyridl)propane)]	[114]	MOF	303	0.31492	5481.33	596.674	0.0757113	63621.3	89.362	0.107991	8117.66	133.501	0.501378	1985.72	766.533	0.00409035	0.00102259
M-11	[Cu2(H2btp)(H2O)2(bipyridine)]	[114]	MOF	303	0.20759	1943.66	789.349	0.0835346	9956.87	437.321	0.708875	4427.69	1240.14	n.p.	n.p.	n.p.	0.00557488	0.0002534
M-12	[Cu2(pzdc)2(pyz)]*2H2O}	[30]	MOF	303	0.297486	2267.92	552.847	0.00608533	2881.07	35.57	0.696429	8817.25	1422.7	n.p.	n.p.	n.p.	0.00266349	0.00066587
M-13	[Mn(mpto)2.CH3CH2OH]2	[24]	MOF	298	0.997801	1724.37	419.835	0.0288478	46396.1	83.6217	0	4068.34	64.4104	n.p.	n.p.	n.p.	0.00458561	0.00035274
M-14	[Ni(dipn)]2[Ni(dipn)(H2O)][Fe(CN)6]2.2H2O	[66]	MOF	298	0.474522	856.229	391.159	0.0503044	63594.5	89.4713	0.475174	5000.4	1631.54	n.p.	n.p.	n.p.	0.0173731	0.00075535
M-15	[Ni(pca)(bdc)0.5(H2O)2]	[58]	MOF	298	0.502848	1116.17	441.62	0.452202	4233.76	1669.2	0.0449495	39945.8	362.133	n.p.	n.p.	n.p.	0.0174013	0.00124295
M-16	[Ni8(L5)6]	[6]	MOF	298	0.250437	516.261	173.973	0.641465	914.891	71.3411	0.108098	2094.58	1596.15	n.p.	n.p.	n.p.	0.00403057	0.00050382
M-17	[Ni8(L5-CF3)6]	[6]	MOF	298	0.603457	470.511	95.2647	0.0339131	20703.4	29.0276	0.36263	453.047	28.3935	n.p.	n.p.	n.p.	0.00556279	0.00042791
M-18	[Ni8(L5-CH3)6]	[106]	MOF	298	0.368366	651.012	476.907	0.0441327	225916	4473.87	0.587501	897.347	33.8348	n.p.	n.p.	n.p.	0.0116193	0.00050519
M-19	[PbL2]*2DMF*6H2O	[98]	MOF	298	0.72899	574.699	268.295	0.221669	4104.18	1088.72	0.0493407	43476	61.0719	n.p.	n.p.	n.p.	0.0215066	0.00430131
M-20	[PbL2]*DMF*2H2O	[98]	MOF	298	0.380853	2474.06	1006.92	0.275345	8569.64	145.352	0.225495	9666.74	23.9791	0.118308	890.853	12.203	0.00317781	0.0015889
M-21	[Zn(NO2-BDC)(dmbpy).5](C2H6O)(H2O)	[47]	MOF	298	0.648998	1439.15	564.666	0.00758079	564.144	172.87	0.0507353	5730.37	56.8162	0.292686	1979.37	102.233	0.00791035	0.00037668
M-22	[Zn2(ip)2(bpy)2]*DMF}n	[87]	MOF	298	0.504148	2996.08	161.355	0.374465	5613.25	1623.94	0.121387	4307.9	94.6146	n.p.	n.p.	n.p.	0.0150873	0.00377182
M-23	[Zn3(TCPB)2*2H2O]*2H2O*4DMF	[10]	MOF	298	0.485515	1113.4	634.152	0.298223	4824.49	741.948	0.216261	5147.34	7.1634	n.p.	n.p.	n.p.	0.0105642	0.0017607
M-24	[Zn4O(mipcapz)3]n on [Zn4O(dmcapz)3]n	[1]	MOF	298	0.655234	616.443	145.235	0.0508649	4022.91	130.095	0.293901	1274.64	183.217	n.p.	n.p.	n.p.	0.0011229	0.00056145
M-25	{(H2PIP)0.5[VO(CEP)]*H2O}	[56]	MOF	298	0.457578	3528.67	61.7314	0.499211	2768.26	669.691	0.0432105	22536.7	5037.52	n.p.	n.p.	n.p.	0.00144587	0.00024098
M-26	{[Cu(azpy)(glut)](H2O)2}	[50]	MOF	298	1	2828.85	558.212	2.2321e-13	42928.5	142.842	5.20933e-12	13110.1	42.6679	n.p.	n.p.	n.p.	0.184509	0.0230637
M-27	{[Cu2(4-pmpmd)2(CH3OH)4(opd)2]*2H2O}	[52]	MOF	298	0.611738	2453.85	356.977	0.0273932	38949.6	96.3591	0.360869	268.36	69.3419	n.p.	n.p.	n.p.	0.0124421	0.00207369
M-28	{[Cu2(pzdc)2(bpy)]*4H2O}	[30]	MOF	303	0.827929	7060.99	2200.88	7.63056e-13	51842	72.6582	0.172071	8392.47	38.8946	n.p.	n.p.	n.p.	0.00660512	0.00082564
M-29	{[Dy(ox)(Bpybc)(H2O)]*OH*13H2O}n	[102]	MOF	298	0.605821	1233.27	239.468	0.00578859	33526.8	186.026	0.38839	5029.82	1248.47	n.p.	n.p.	n.p.	0.00827653	0.00165531
M-30	{[Ni(bpe)2(N(CN)2)](N(CN)2)}n	[86]	MOF	298	0.374693	757.332	222.773	0.0553997	47977.7	170.794	0.569907	3913.89	1467.44	n.p.	n.p.	n.p.	0.0298965	0.00071182
M-31	{[Zn-(C10H2O8)0.5(C10S2N2H8)]*5H2O]}n	[60]	MOF	298	0.536367	5433.19	2612.98	0.021101	23350.1	67.9981	0.213241	7078.37	21.7203	0.229291	1377.99	19.1107	0.0256776	0.0042796
M-32	{[Zn(oxo-pba)2(bpy)]4H2O}n	[116]	MOF	298	0.410288	988.993	342.615	0.0396314	35831	50.162	0.250249	5202.27	1774.78	0.299831	571.173	16.164	0.00593302	0.00074163
M-33	{[Zn2(bpdc)2(azpy)]*2H2O*2DMF}n	[61]	MOF	298	0.6809	1198.04	400.056	0.195248	4648.66	868.421	0.0491637	14900.6	23.1959	0.0746885	414.626	81.3269	0.00552073	0.00092012
M-34	{[Zn2(bpdc)2(azpy)]*2H2O*2DMF}n Nanoscale	[61]	MOF	298	0.641911	2471.93	1181.27	0.0411628	45991.2	522.036	0.0884008	9792.94	66.8647	0.228525	610.739	28.0655	0.0157289	0.00393223
M-35	{[Zn3(bpdc)3(azpy)]*4H2O*2DEF}n	[61]	MOF	298	0.483506	1912.59	936.979	0.0597669	37544.8	69.157	0.11173	6479.35	54.7906	0.344998	393.419	14.4078	0.0199805	0.00333008
M-36	{[Zn4O(bfbpdc)3-(bpy)0.5(H2O)]*(3DMF)(H2O)}n	[59]	MOF	298	5.77842e-05	9404.59	277.927	0.0096241	8775.94	2382.47	0.0460188	448.533	74.9494	0.944299	275.018	18.4202	0.00034131	5.6886e-05
M-37	{[ZnL(HCO2)(H2O)]*DMF}	[108]	MOF	298	0.505206	1572.42	621.885	0.394304	1944.84	156.039	0.10049	6089.27	70.8828	n.p.	n.p.	n.p.	0.00502223	0.00045657
M-38	1 C76H116N14O42Zn3	[117]	MOF	298	0.438828	3687.69	1112.92	0.0347731	30385.5	42.8026	0.0789348	8851.64	13.1387	0.447464	688.983	375.316	0.0173676	0.00056025
M-39	1-LiCl	[111]	MOF	298	0.624278	3489.89	675.209	0.187254	6880.94	19.304	0.188467	4895.33	4.13805	n.p.	n.p.	n.p.	0.0163169	0.00543896
M-40	2D [Cu(bpy)2(OTf)2]n	[69]	MOF	303	0.508449	4203.02	1075.15	0.0262653	15752.6	46.6811	0.177976	5464.64	481.515	0.28731	552.756	15.0288	0.00210625	0.00026328
M-41	Blucher-101408	[106]	MOF	298	0.499087	750.514	191.675	0.0095978	9746.26	65.7096	0.491315	563.184	47.0046	n.p.	n.p.	n.p.	0.00226678	0.00013334
M-42	Bu-FeCr	[111]	MOF	298	0.565583	2478.04	969.924	0.0906942	21389.5	38.0777	0.343723	530.473	121.208	n.p.	n.p.	n.p.	0.0157284	0.00196605
M-43	C10H4O12Eu2	[90]	MOF	298	0.880407	4018.96	1523.08	0.00186327	33461	109.566	0.117729	15445.7	48.493	n.p.	n.p.	n.p.	0.033553	0.00139804
M-44	C115.5H202N14O43Zn4	[91]	MOF	298	0.491865	970.164	355.556	0.293824	3267.95	547.145	0.214311	12498.8	17.2118	n.p.	n.p.	n.p.	0.00627453	0.00125491
M-45	C11H15BrN2O4Zn	[72]	MOF	298	0.501868	1511.16	491.198	0.0175516	40960.8	434.012	0.480581	6446.47	1545.68	n.p.	n.p.	n.p.	0.00726914	0.00034615
M-46	C11H15ClN2O4Zn	[72]	MOF	298	0.598864	2357.98	736.67	0.0084033	12053.4	112.575	0.052973	7731.81	36.2822	0.33976	2056.68	23.9783	0.0111322	0.0005301
M-47	C12H17ClN2O3Cd	[51]	MOF	303	0.273736	391.039	96.4797	0.120947	1543.93	525.368	0.605317	393.354	10.5173	n.p.	n.p.	n.p.	0.0428965	0.00225771
M-48	C15H27N2O10Dy	[53]	MOF	298	0.670754	4336.08	1032.02	0.0159415	33773.6	247.857	0.313304	11656.1	48.233	n.p.	n.p.	n.p.	0.00375814	0.00037581
M-49	C15H27N2O10Er	[53]	MOF	298	0.533168	3165.41	798.944	0.0446025	24964.7	88.2978	0.42223	13623.6	87.4998	n.p.	n.p.	n.p.	0.00221084	0.00022108
M-50	C15H27N2O10Ho	[53]	MOF	298	0.498427	4155.33	996.879	0.104268	5114.86	94.1346	0.397306	8973.67	1745.87	n.p.	n.p.	n.p.	0.00025036	2.276e-05
M-51	C15H27N2O10Tb	[53]	MOF	298	0.22267	3562.54	446.802	0.0227114	48056.9	245.212	0.754618	7099.07	717.242	n.p.	n.p.	n.p.	6.0177e-05	2.0059e-05
M-52	C15H27N2O10Tm	[53]	MOF	298	0.784706	3264.3	797.129	0.00530482	31298.3	124.697	0.20999	13628.9	43.2594	n.p.	n.p.	n.p.	0.00365906	0.00033264
M-53	C18H21Br2N4O9Cd2	[51]	MOF	303	0.395079	762.963	306.669	0.0837376	44971.9	84.5043	0.521183	4116.32	1422.07	n.p.	n.p.	n.p.	0.0181402	0.00100779
M-54	C24H40N2O16Cl2Cd3	[37]	MOF	298	0.612814	5591.88	1149.57	0.0639022	14928.8	1476.55	0.103093	9991.87	515.171	0.220191	217.849	117.573	0.00727016	0.00013218
M-55	C26H24Br2Cu2N8O3	[101]	MOF	298	0.999076	9467.48	1700.2	0.000923493	16086.4	117.145	1.74217e-08	9624.56	71.8343	n.p.	n.p.	n.p.	0.0032134	0.00064268
M-56	C28H24CoN10	[93]	MOF	298	0.429205	4811.28	2070.32	6.36713e-14	8611.05	183.702	0.570795	531.559	189.702	n.p.	n.p.	n.p.	0.0174816	0.00158923
M-57	C32H24Cu3N6O12	[13]	MOF	288	0.684511	4424.86	1897.23	0.0857857	10280.8	103.573	0.229703	5227.2	174.926	n.p.	n.p.	n.p.	0.0181337	0.00045334
M-58	C32H46N4O8Zn	[100]	MOF	298	0.586938	1061.06	271.399	0.321665	3772.9	873.9	0.0913966	8111.55	47.1989	n.p.	n.p.	n.p.	0.020109	0.00223433
M-59	C4H8HoKO12 Dehydrated	[54]	MOF	298	0.0947849	1760.61	579.385	0.0698521	33628.4	74.9377	0.266903	9929.58	250.295	0.56846	8021.49	385.722	0.0211543	0.00264429
M-60	C55H52Fe4N20O18	[32]	MOF	298	0.727113	6365.88	1963.73	0.0807811	673.653	71.9343	0.192106	9102.24	38.6779	n.p.	n.p.	n.p.	0.0262905	0.00262905
M-61	C62H44N2O8Zn2	[57]	MOF	298	0.682367	155.763	57.3347	0.035456	164928	232.236	0.282177	2244.72	692.926	n.p.	n.p.	n.p.	0.0535742	0.00446451
M-62	C62H50Cd3K2N2O26	[105]	MOF	298	0.987258	2621.5	1169.35	0.112665	11630.5	29.5228	0.0494534	1700.95	33.9859	0	5515.09	421.041	0.00528655	0.0001958
M-63	C9H11ClN2O4Cd	[51]	MOF	303	0.655913	4958.14	1675.53	0.237706	5093.24	195.716	0.106381	6333.37	45.0852	n.p.	n.p.	n.p.	0.0342557	0.00114186
M-64	CALF-25	[73]	MOF	298	0.631053	716.796	254.173	0.251938	2612.03	586.112	0.117009	18335.8	3382.09	n.p.	n.p.	n.p.	0.00732243	0.00066568
M-65	CAU-10-CH3	[111]	MOF	298	0.614698	1641.15	392.149	0.132017	6884.86	1583.8	0.253285	2013.57	29.8858	n.p.	n.p.	n.p.	0.00568275	0.00035517
M-66	CAU-10-H	[111]	MOF	298	0.374274	2911.8	1262.18	0.350639	4243.65	5.81631	0.275087	4499.97	6.17744	n.p.	n.p.	n.p.	0.362915	0.0279165
M-67	CAU-10-NH2	[111]	MOF	298	0.504012	4061.28	710.956	0.449034	8091.1	2793.62	0.0469543	6700.54	20.3467	n.p.	n.p.	n.p.	0.00514242	0.00025712
M-68	CAU-10-NO2	[111]	MOF	298	0.882347	2692.08	255.452	0.0209097	52579	138.367	0.0967436	4276.17	166.569	n.p.	n.p.	n.p.	0.00315529	0.00021035
M-69	CAU-10-OCH3	[111]	MOF	298	0.175798	2486.53	446.331	0.0376297	30504.6	85.3375	0.0817766	5192.1	57.0199	0.704796	3336.57	33.7284	0.0141921	0.00283843
M-70	CAU-10-OH	[111]	MOF	298	0.269931	1387.68	611.766	0.0294174	24465.2	54.2321	0.0342338	11363.8	47.2637	0.666418	4884.69	384.549	0.0562208	0.00216234
M-71	CAU-10-pydc	[2]	MOF	303	0.471067	5733	650.685	0.0176472	10624.5	55.6988	0.511286	5988.54	2115.59	n.p.	n.p.	n.p.	0.00562562	0.00031253
M-72	CAU-13	[62]	MOF	298	0.478578	2237.69	1378.68	0.0411272	18128.7	50.5004	0.480294	3873.23	67.9948	n.p.	n.p.	n.p.	0.016113	0.00123946
M-73	CAU-1-NH2	[97]	MOF	298	0.970575	1924.79	289.155	0.00141261	37181.6	70.7548	0.0280129	18374.3	55.3589	n.p.	n.p.	n.p.	0.0132972	0.0006332
M-74	CAU-1-NHCH3	[97]	MOF	298	0.0626246	554.307	69.213	0.139684	4572.78	2744.55	0.248825	2253.54	420.523	0.548866	2395.2	105.919	0.00398878	0.00014773
M-75	CAU-1-NHCOCH3	[97]	MOF	298	0.502105	2657.41	551.201	0.431919	3835.1	1681.54	0.0659758	15900.5	28.0091	n.p.	n.p.	n.p.	0.00657949	0.00029907
M-76	Cd (II)-MOF [Cd(L)(DMF)]	[112]	MOF	298	0.496761	2211.23	1023.48	0.0502284	11532	83.4076	0.453011	7601.96	1393.94	n.p.	n.p.	n.p.	0.0104033	0.00047288
M-77	CID-3	[89]	MOF	298	0.94725	1261.83	237.896	0.0387548	40400.3	88.9619	0.0139949	15962.5	59.9393	n.p.	n.p.	n.p.	0.043299	0.00309278
M-78	Cobalt Triazolyl Phosphonate MOF	[115]	MOF	298	0.275868	2040.81	1066.84	0.572797	6318.68	45.2945	0.151335	7175.95	44.7209	n.p.	n.p.	n.p.	0.00663872	0.00060352
M-79	Cobalt Triazolyl Phosphonate MOF (95%RH)	[115]	MOF	298	0.15854	1494.98	408.026	0.209555	7652.26	68.6048	0.265798	8501.24	3607.6	0.366107	5708.21	8.30731	0.0089829	0.00089829
M-80	Cobalt Triazolyl Phosphonate MOF (Activated at 403K)	[115]	MOF	298	0.372904	826.193	258.616	0.475461	3103.49	1085.04	0.151635	6572.48	11.2532	n.p.	n.p.	n.p.	0.0140554	0.00063888
M-81	Co-MOF-74(M)	[27]	MOF	298	0.473273	7412.91	2465.11	0.000108443	81705.8	155.186	0.526619	9265.16	647.697	n.p.	n.p.	n.p.	0.00198775	0.00066258
M-82	Co-MOF-74(S)	[27]	MOF	298	0.647982	7602.15	2001.11	0.086781	10902.3	426.886	0.265237	8827.08	154.052	n.p.	n.p.	n.p.	0.00237355	0.00079118
M-83	CPO-27-Ni	[99]	MOF	298	0.913687	10093.5	3317.48	5.11813e-13	47040.8	265.871	0.0863131	11458.9	41.8934	n.p.	n.p.	n.p.	0.0258989	0.00076173
M-84	Cr-MIL(101)	[111]	MOF	298	0.341587	1982.73	68.2383	0.542525	1491.4	123.126	0.115887	4689.16	626.69	n.p.	n.p.	n.p.	0.025176	0.00049365
M-85	Cr-MIL-101-NO2	[111]	MOF	298	0.500503	1739.71	137.625	0.21438	2984.98	1652.26	0.285117	2055.06	26.7197	n.p.	n.p.	n.p.	0.0388255	0.0008824
M-86	CuBTC	[42]	MOF	298	0.652616	3263.41	1747.3	0.0193504	9539.99	53.6544	0.328034	9530.61	2300.99	n.p.	n.p.	n.p.	0.0533628	0.00172138
M-87	Cu-MOF	[84]	MOF	303	0.47193	10605.2	2264.05	0.52807	15773.4	90.2238	2.00451e-09	12837.1	73.3195	n.p.	n.p.	n.p.	0.0013389	0.00066945
M-88	DETA-MIL-101	[96]	MOF	298	0.50723	1020.81	335.219	0.337874	9016.78	2889.74	0.154896	3467.23	15.2365	n.p.	n.p.	n.p.	0.00894247	0.00149041
M-89	DMOF-Cl2	[82]	MOF	298	0.713753	2480.07	114.966	0.208922	3748.84	1800.11	0.0773251	904.526	7.879	n.p.	n.p.	n.p.	0.00138988	0.00069494
M-90	DMOF-NO2	[82]	MOF	298	0.685727	1957.61	143.727	0.0620925	52377.1	2.09209e+13	0.12191	6061.88	204.419	0.13027	7944.04	306.064	0.0142813	0.00084008
M-91	DMOF-OH	[82]	MOF	298	0.94382	3030.77	1183.74	0.0476391	74334.3	104.416	0.00854126	12304.6	17.4661	n.p.	n.p.	n.p.	0.011723	0.00586148
M-92	DUT-10(Zn)	[18]	MOF	298	0.314576	384.932	89.4233	0.227271	1895.24	539.187	0.458152	230.121	41.8991	n.p.	n.p.	n.p.	0.00511756	0.00127939
M-93	DUT-4	[40]	MOF	298	0.534645	682.919	422.22	0.441464	1266.71	147.872	0.0238912	28228.3	39.6173	n.p.	n.p.	n.p.	0.024521	0.00204342
M-94	DUT-67	[74]	MOF	298	0.503223	2572.15	359.778	0.231963	6710.33	1063.47	0.264813	3421.13	49.9707	n.p.	n.p.	n.p.	0.0115834	0.00050363
M-95	ED-ZIF-8	[3]	MOF	298	0.49949	3320	602.884	0.454128	1844.56	190.544	0.0463815	14150.5	63.213	n.p.	n.p.	n.p.	0.00632676	0.00158169
M-96	Et-MnCr	[111]	MOF	298	0.688893	2459.28	943.268	0.0425337	39044.3	54.0945	0.268573	3341.47	69.748	n.p.	n.p.	n.p.	0.0182706	0.00083048
M-97	HKUST-1-F	[11]	MOF	298	0.165103	4549.45	2283.88	0.0415135	998.396	89.1569	0.113912	7921.83	1139.82	0.679471	94.7544	7.26008	0.150393	0.00417759
M-98	JUC-110	[95]	MOF	298	0.880407	4018.96	1523.08	0.00186327	33461	109.566	0.117729	15445.7	48.493	n.p.	n.p.	n.p.	0.033553	0.00139804
M-99	Lanthanum Triazolyl Phosphonate MOF	[115]	MOF	298	0.503989	3046.96	1451.5	0.0482954	20709.8	252.411	0.447716	3480.87	71.2329	n.p.	n.p.	n.p.	0.0790488	0.00464993
M-100	Me-FeCr	[111]	MOF	298	0.433153	2430.67	384.574	0.0582483	194919	394.465	0.508599	1547.51	86.7963	n.p.	n.p.	n.p.	0.0167407	0.00050729
M-101	MFU-4	[88]	MOF	298	0.999824	3670.43	799.349	0.000176153	25807.9	1227.6	1.04868e-10	34667	53.3559	n.p.	n.p.	n.p.	0.0110137	0.00550686
M-102	Mg-CPO-27	[111]	MOF	298	0.196522	2824.33	1038.06	0.259226	27890.2	94.9656	0.544251	8949.8	39.4882	n.p.	n.p.	n.p.	0.00070688	0.00014138
M-103	Mg-MOF-74©	[94]	MOF	298	0.355086	3334.86	1891.62	0.246677	82716.5	116.176	0.398237	10054.3	890.439	n.p.	n.p.	n.p.	0.030868	0.00068596
M-104	MIL-100	[36]	MOF	293	0.734923	2699.18	812.921	0.220005	3314.72	175.904	0.0450716	21984.8	31.617	n.p.	n.p.	n.p.	0.00573671	0.00071709
M-105	MIL-100(Cr)	[49]	MOF	298	0.861102	1034.43	436.481	0.0394738	46386.4	341.283	0.0865572	7497.97	41.1851	0.0128674	1571.01	13.9608	0.0183099	0.00610331
M-106	MIL-100(Cr)-DEG	[33]	MOF	293	0.954502	2305.52	781.718	0.0435623	29794.8	93.4234	0.00193529	16309	32.6743	n.p.	n.p.	n.p.	0.0133021	0.00166276
M-107	MIL-100(Cr)-EG	[33]	MOF	293	0.953511	2297.44	772.709	0.0458705	37854.3	62.1178	0.000618804	22120.4	53.4518	n.p.	n.p.	n.p.	0.0127395	0.00181992
M-108	MIL-100(Cr)-EN	[33]	MOF	293	0.94494	2462.35	881.867	0.0205246	28094.9	45.4401	0.0345355	20225.1	51.0966	n.p.	n.p.	n.p.	0.00707671	0.00101096
M-109	MIL-100(Cr)-TEG	[33]	MOF	293	0.959402	2222.69	766.667	0.0144373	34069	77.9291	0.0261608	8586.19	31.6973	n.p.	n.p.	n.p.	0.0147306	0.00163673
M-110	MIL-100(Fe)	[40]	MOF	298	0.902785	2411.51	516.544	0.00867131	18309.2	120.691	0.0885436	17528.2	64.849	n.p.	n.p.	n.p.	0.0210224	0.00175187
M-111	MIL-101-NH2	[41]	MOF	298	0.462991	2459.57	112.355	0.205289	2055.68	14.6578	0.331721	1384.48	950.042	n.p.	n.p.	n.p.	0.0705101	0.00201457
M-112	MIL-101-SO3H	[41]	MOF	298	0.565383	2945.15	557.429	0.251749	5187.71	3339.36	0.182868	2457.9	16.5748	n.p.	n.p.	n.p.	0.0211994	0.00054357
M-113	MIL-125	[28]	MOF	298	0.794565	2367.48	92.3901	0.0124622	97969.4	171882	0.192973	1780.4	1322.66	n.p.	n.p.	n.p.	0.012114	0.0010095
M-114	MIL-125-NH2	[111]	MOF	298	0.477814	4174.9	188.538	0.0460496	160082	264594	0.476137	4239.55	935.317	n.p.	n.p.	n.p.	0.0118508	0.00107734
M-115	MIL-160	[2]	MOF	303	0.22466	4994.25	2236.33	0.0201472	39074	149.157	0.0577792	6875.78	60.1735	0.697413	6145.38	660.759	0.00386445	0.00021469
M-116	MIL-163	[8]	MOF	298	0.692273	1356.95	236.212	0.0300022	53049.3	74.6821	0.0576168	9331.58	47.4899	0.220108	1265.64	1883.43	0.0276566	0.00095368
M-117	MIL-53(Al)ht	[104]	MOF	298	0.111076	4176.15	304.195	0.0102196	48949.7	331076	0.226931	3614.47	1064.87	0.651774	5691.76	36.7163	0.00266999	0.0002225
M-118	MIL-53(Al)it	[104]	MOF	298	0.0103711	206.144	370.392	0.335366	2687.73	1438.29	0.353735	1240.56	354.614	0.300528	1024.75	9.95497	0.00665765	0.00051213
M-119	MIL-53(Cr)	[67]	MOF	298	0.531792	7.62525e-06	2623.19	0.0473664	5114.4	7.18374	0.420842	84.633	4.66187	n.p.	n.p.	n.p.	0.166393	0.0554644
M-120	NBu4	[111]	MOF	298	0.693403	903.689	563.487	0.095439	15513.7	52.6724	0.211158	4702.16	758.334	n.p.	n.p.	n.p.	0.0386612	0.00483265
M-121	NENU-11	[68]	MOF	298	0.903317	5009.19	708.95	0.0962217	24141.4	94.5555	0.000461508	25085.2	87.8197	n.p.	n.p.	n.p.	0.028446	0.00055776
M-122	Ni3C87H118N12O29	[55]	MOF	298	0.503142	696.702	284.087	0.448198	3800.06	1079.57	0.0486601	23221.6	32.735	n.p.	n.p.	n.p.	0.0187503	0.00093752
M-123	Ni-DOBDC	[80]	MOF	298	0.38539	3962.22	3115.1	6.92628e-11	55931.4	90.8128	0.61461	9219.25	49.5433	n.p.	n.p.	n.p.	0.018139	0.0036278
M-124	Pip-CPO-27-Ni	[99]	MOF	298	0.17911	1802.43	680.656	0.182876	47520.4	253.731	0.0285622	20672.7	51.24	0.609451	10432.9	2517.17	0.00307475	9.9185e-05
M-125	PIZOF-2	[74]	MOF	298	0.414946	668.364	14.0049	0.572226	713.067	58.2337	0.0128275	130653	113829	n.p.	n.p.	n.p.	0.00922636	0.00043935
M-126	pretreated a-Al	[113]	MOF	298	0.386316	4425.87	196.023	0.171834	1589.95	594.774	0.363281	4473.42	14.8866	0.0785688	10126.1	65.3733	0.00579583	0.00038639
M-127	pretreated m-Al	[113]	MOF	298	0.504771	3324.86	1108.81	0.111448	9448.81	823.194	0.383781	4015.05	32.4581	n.p.	n.p.	n.p.	0.00441064	0.00029404
M-128	SIM-1	[111]	MOF	298	0.27248	637.987	285.33	0.0295771	56144.9	95.2203	0.697943	3495.27	654.212	n.p.	n.p.	n.p.	0.00587304	0.00039154
M-129	S-MIL-53(Al)	[39]	MOF	298	0.136107	444.938	18.7633	0.459528	279.848	11.8427	0.404365	2035.01	251.786	n.p.	n.p.	n.p.	0.00792566	0.00052838
M-130	SNU-80	[14]	MOF	298	0.692057	1485.37	850.847	0.0874234	32647	98.8091	0.22052	28522.6	146.142	n.p.	n.p.	n.p.	0.0585277	0.00585277
M-131	TAF-1a	[16]	MOF	298	0.851932	2611.96	1127.56	0.0758585	33470.7	82.2708	0.0722095	22475.3	56.5387	n.p.	n.p.	n.p.	0.0267425	0.00222854
M-132	Ti(pyradine-2-carboxylic acid)	[11]	MOF	298	0.598019	1450.17	352.133	0.347201	3911.52	60.244	0.0547803	16839	4828.64	n.p.	n.p.	n.p.	0.052446	0.00308506
M-133	UiO-66	[74]	MOF	298	0.61831	2543.3	80.8074	0.373103	3199.33	947.114	0.00858691	62739.1	88.281	n.p.	n.p.	n.p.	0.00445687	0.00017827
M-134	UiO-66(Zr)-(COOH)2	[5]	MOF	303	0.314655	457.01	179.125	0.055793	19555	4429.77	0.629552	4105.18	1535.03	n.p.	n.p.	n.p.	0.0115071	0.00191785
M-135	UiO-66(Zr4+) with high concentration stearic acid	[46]	MOF	298	0.498584	2886.27	172.791	0.303862	5993.62	3255.16	0.197554	4231.95	153.52	n.p.	n.p.	n.p.	0.0293638	0.00046609
M-136	UiO-66(Zr4+) with metal/ligand ratio 6:3	[46]	MOF	298	0.588853	3423.87	821.975	0.105863	22130.4	6081.47	0.305283	2884.78	39.4301	n.p.	n.p.	n.p.	0.0193954	0.00037299
M-137	UiO-66-NH2	[63]	MOF	298	0.669541	4953.22	1444.28	0.0190888	40622.5	6062.62	0.31137	4348.18	222.72	n.p.	n.p.	n.p.	0.00211295	0.00023477
M-138	UMCM-1	[63]	MOF	298	0.610467	709.637	208.699	0.0811338	2088.81	289.398	0.308399	4554.22	1173.57	n.p.	n.p.	n.p.	0.0121707	0.00608537
M-139	untreated a-Al	[113]	MOF	298	0.685314	3672.99	927.278	0.00269112	47012.1	155.915	0.177461	8671.51	39.2069	0.134534	12110.5	17.7614	0.00333339	0.0004762
M-140	untreated m-Al	[113]	MOF	298	0.331051	2023.79	1148.53	0.0277168	18803.3	93.3857	0.641232	4515.64	39.7637	n.p.	n.p.	n.p.	0.0203395	0.00065611
M-141	Y-fum-fcu-MOF	[7]	MOF	298	0.56522	4156.19	1258.51	0.172976	5729.9	304.307	0.261804	6464.65	83.5495	n.p.	n.p.	n.p.	0.00541576	0.00023547
M-142	ZIF-8	[57]	MOF	298	0.199231	453.531	329.476	0.0091528	219776	323.451	0.791617	139.958	4.07974	n.p.	n.p.	n.p.	0.00497931	0.00033195
M-143	Zn(II)-MOF [Zn(HPylmDC)(DMA)]n	[123]	MOF	298	0.587552	2002.29	1096.4	0.000174658	40295.7	57.1877	0.366599	10576	2143.63	0.0456736	5511.66	8.45399	0.0218463	0.00121368
M-144	Zn(L)(tdca)*1.5DMF	[118]	MOF	298	0.718527	4076.43	844.685	0.00560476	34583.5	183.186	0.275869	7599.14	35.1897	n.p.	n.p.	n.p.	0.0070475	0.00041456
M-145	Zn(NDI-H)	[109]	MOF	293	0.925135	2007.68	125.174	0.0300225	39859.6	55.68	0.0448426	662.211	54.3154	n.p.	n.p.	n.p.	0.0115415	0.00164879
M-146	Zn(NDI-NHEt)	[109]	MOF	293	0.578078	1767.46	396.06	0.372649	1956.29	41.1491	0.0492726	37299.9	52.0172	n.p.	n.p.	n.p.	0.00644347	0.00053696
M-147	Zn(NDI-SEt)	[111]	MOF	293	0.313869	973.962	284.457	0.0768997	101281	17738.1	0.609231	3694.03	720.484	n.p.	n.p.	n.p.	0.0105553	0.00050263
M-148	Zn(NDI-SO2Et)	[111]	MOF	293	0.635644	2528.47	832.018	0.0561499	7482.57	244.681	0.308207	2581.99	127.118	n.p.	n.p.	n.p.	0.00685637	0.00048974
M-149	Zn(NDI-SOEt)	[111]	MOF	293	0.313869	973.962	284.457	0.0768997	101281	17738.1	0.609231	3694.03	720.484	n.p.	n.p.	n.p.	0.0105553	0.00050263
M-150	Zn(NO3)2*6H2O	[12]	MOF	293	0.868059	6161.86	1322.91	0.12984	8095.5	201.056	0.00210096	14277.4	20.215	n.p.	n.p.	n.p.	0.0054043	0.00180143
M-151	Zn2C14N2O8H4	[65]	MOF	298	0.644464	4614.06	540.565	0.343052	2338.02	312.153	0.0124835	13056.8	60.4683	n.p.	n.p.	n.p.	0.00580891	0.00029045
M-152	Zn3(TCPB)2(H2O)2	[107]	MOF	298	0.499006	310.727	215.155	0.067066	40223.6	56.5939	0.433928	3307.07	1062.8	n.p.	n.p.	n.p.	0.0396052	0.00330044
M-153	Zn4O(dmcapz)3	[71]	MOF	298	0.794076	436.37	206.381	0.192267	514.171	32.5331	0.0136573	9692.6	15.5452	n.p.	n.p.	n.p.	0.0273294	0.00075915
M-154	Zn-BTTB-DMBPY	[83]	MOF	298	0.038037	1869.12	388.453	0.941854	496.234	21.8939	0.0201089	3988.5	18.2495	n.p.	n.p.	n.p.	0.00015167	7.5836e-05
M-155	Zn-MOF-74(cycle 1)	[48]	MOF	298	0.248079	2335.72	778.419	0.0945362	14127.2	36.3076	0.657384	9894.05	2235.86	n.p.	n.p.	n.p.	0.0175474	0.0006749
M-156	Zr-MOF-801-P	[74]	MOF	298	0.504166	4320.19	1337.3	0.0482291	29880.5	417.264	0.447605	6285.43	217.982	n.p.	n.p.	n.p.	0.00313079	0.00017393
M-157	Zr-MOF-801-SC	[74]	MOF	298	0.49823	6060.17	181.567	5.73004e-06	19335.7	217674	0.501764	3241.64	961.31	n.p.	n.p.	n.p.	0.00585519	0.00048793
M-158	Zr-MOF-802	[74]	MOF	298	0.628419	5130.67	1639.2	0.0613119	9405.31	75.7521	0.31027	1730.81	619.749	n.p.	n.p.	n.p.	0.00936915	0.00062461
M-159	Zr-MOF-804	[74]	MOF	298	0.797664	2227.9	124.83	0.0769801	3411.84	61.3256	0.125356	10645.1	13053.5	n.p.	n.p.	n.p.	0.0248874	0.00124437
M-160	Zr-MOF-805	[74]	MOF	298	0.95588	2683.36	534.286	0.0422665	26299.9	109.594	0.00185359	17300.2	38.6782	n.p.	n.p.	n.p.	0.012868	0.0006434
M-161	Zr-MOF-806	[74]	MOF	298	0.947185	5052.42	1806.16	0.00112335	30993.6	140.132	0.0516912	18801.7	51.5026	n.p.	n.p.	n.p.	0.0415799	0.00198
M-162	Zr-MOF-808	[74]	MOF	298	0.494796	2864.04	126.806	0.182665	4284.11	3294.86	0.322539	2692.61	29.1926	n.p.	n.p.	n.p.	0.0128877	0.00049568
M-163	Zr-MOF-841	[74]	MOF	298	0.719411	3446.08	19.6234	0.254893	2604.37	700.536	0.0256961	7395.71	10.2094	n.p.	n.p.	n.p.	0.0323847	0.00190498
O-1	HMn8O16	[21]	Metal oxide	298	0.274256	6614.73	839.84	0.137496	53187.8	74.5446	0.147546	29165	91.0462	0.440703	737.451	308.129	0.0173441	0.00289069
O-2	Na0.21H3.49Mn12O23	[21]	Metal oxide	298	0.532962	625.539	198.537	0.0738152	41023.4	514.484	0.393223	6372.61	2159.03	n.p.	n.p.	n.p.	0.0198186	0.00247732
O-3	AOP-CH2	[81]	MOP	298	0.26789	999.175	238.922	0.0642251	2825.19	107.987	0.0418716	45950.7	159.814	0.626013	455.587	115.022	0.0033565	0.00027971
O-4	H[Ce(H2O)4]2[MnV13O38]*9NMP*17H2O	[103]	POM	298	0.819209	1953.21	874.97	0.0145491	22101	109.429	0.166242	10894.5	44.2675	n.p.	n.p.	n.p.	0.0540029	0.00771469
S-1	0.1TPABr-0.05Na20-SiO2-40H2O	[44]	Silicic	300	0.267809	4805.95	661.701	0.0817902	45964.1	166.464	0.180458	7145.67	27.1141	0.469943	1907.59	469.135	0.00701175	0.00100168
S-2	0.1TPAOH-SiO2-40H20	[44]	Silicic	300	0.550555	3132.9	1817.96	0.147199	22705.3	155.885	0.0211222	14005.4	38.212	0.281124	504.097	17.0922	0.0254833	0.00364047
S-3	0.36TPAOH-0.39HF-SIO2-34H20	[44]	Silicic	300	0.609271	1436.32	302.231	0.347307	802.968	95.3519	0.0434219	5207.58	125.566	n.p.	n.p.	n.p.	0.0156895	0.00112068
S-4	Grade 03 Silica Gel	[75]	Silicic	293	0.409593	2118.61	383.294	0.0593087	13354.8	1991.06	0.0456531	8616.21	80.1543	0.485446	4279.65	1073.26	0.00247931	0.00027548
S-5	Silica Gel	[36]	Silicic	301	0.456464	2273.37	563.294	0.0997542	10730.3	16.5057	0.443782	4682.86	865.181	n.p.	n.p.	n.p.	0.00089759	8.9759e-05
S-6	Silicalite MFI	[45]	Silicic	298	0.480452	1820.69	566.498	0.181622	35429.6	220.748	0.243909	5247.35	737.823	0.0940171	1071.55	12.234	0.0131824	0.00038772
S-7	TPABr	[44]	Silicic	300	0.605602	445.129	294.093	0.189495	3689.57	860.196	0.204903	10421.1	26.7928	n.p.	n.p.	n.p.	0.07658	0.0095725
S-8	TPAOH	[44]	Silicic	300	0.515863	2443.68	1498.56	0.00236883	44014	158.562	0.228398	14203.3	39.8684	0.253371	497.927	11.5811	0.0212644	0.00265805
S-9	TPAOH/HF	[44]	Silicic	300	0.113485	1285.14	463.386	0.0472618	80368	65988.3	0.839253	337.074	27.2831	n.p.	n.p.	n.p.	0.0361495	0.00451869
S-10	ZSM-5	[64]	Silicic	298	0.800692	2612.25	585.078	0.0303714	33047.7	115.889	0.168937	13545.5	42.8328	n.p.	n.p.	n.p.	0.0210577	0.00300824
S-11	HKUST-1 replica	[17]	Silicic	303	0.489054	792.66	280.961	0.135981	9719.46	57.2325	0.374965	2918.62	870.918	n.p.	n.p.	n.p.	0.01491	0.00093188
Z-1	CBV-901	[76]	Zeolite	294	0.501223	3304.38	418.102	0.294352	11645.9	211.253	0.204424	7828.46	40.4084	n.p.	n.p.	n.p.	0.0301487	0.0100496
Z-2	H0.34Na0.06Al0.4Si47.6O96	[21]	Zeolite	298	0.564649	1629.42	546.13	0.060598	51308.1	71.6439	0.374753	4856.34	777.043	n.p.	n.p.	n.p.	0.0067727	0.00112878
Z-3	HiSiv 3000 Zeolite	[75]	Zeolite	293	0.822557	3942.36	1480.71	0.0798092	30868.1	78.6114	0.0976338	12976.6	45.3454	n.p.	n.p.	n.p.	0.0189645	0.00172405
Z-4	K6Na6Al12O48	[21]	Zeolite	298	0.443258	9463.21	3452.63	0.292865	12023.5	16.3643	0.263877	12975.5	17.7051	n.p.	n.p.	n.p.	0.129032	0.0107527
Z-5	MCM-41	[49]	Zeolite	298	0.575204	769.457	82.7194	0.0411325	57559.6	204.28	0.0619948	3007.01	23.3766	0.321668	874.085	372.992	0.00621887	0.00310944
Z-6	Na-ZSM-5	[49]	Zeolite	298	0.248079	2335.72	778.419	0.0945362	14127.2	36.3076	0.657384	9894.05	2235.86	n.p.	n.p.	n.p.	0.0175474	0.0006749
Z-7	Zeolite 13X	[42]	Zeolite	298	0.205872	3012.95	1155.69	0.0731505	44041.5	950.996	0.334041	6123.99	21.5729	0.386936	5533.8	34.4964	0.116788	0.00778587
Z-8	Zeolite 4A	[78]	Zeolite	298	0.244991	5616.58	1534.71	0.239936	28785.7	89.1058	0.515074	11728.4	2437.57	n.p.	n.p.	n.p.	0.0018347	0.00020386
Z-9	Zeolite Na-A	[120]	Zeolite	298	0.282754	5591.72	1395.23	0.417633	9351.72	98.0475	0.0664831	38043.6	53.5586	0.23313	8530.28	17.4134	0.0173676	0.00578922
Z-10	Zn2(pbc)2*Hdma*H3O*2H2O	[9]	Zeolite	298	0.727554	3107.02	1298.29	0.250151	8283.22	679.561	0.0222952	17390.3	24.2735	n.p.	n.p.	n.p.	0.00841441	0.0028048
n.p. represents "no parameters" a) Chi-sqare (χ2) and reduced chi-square (χv2) are statistical indicators that commonly used to judge the goodness of curve fitting. According to the rule of thumb, a "good" fitting has χv2 less than 1, and smaller χ2 usually means smaller fitting error with the reasonable fitting parameters.
We conducted chi-square goodness-of-fit test1 for each fitting, and provided statistical indicators including the chi-square (χ2) and reduced chi-square (χv2) that commonly used to judge the goodness of curve fitting in Table S1. According to the rule of thumb, a "good" fitting has χv2 less than 1, and smaller χ2 usually means smaller fitting error with the reasonable fitting parameters.2-3 All a…
1	Cochran, W. G., The χ2 test of goodness of fit. The Annals of Mathematical Statistics 1952, 23 (3), 315-345.
2	Chi-square: testing for goodness of fit. http://maxwell.ucsc.edu/~drip/133/ch4.pdf.
3	Chi square distribution (X2) and least squares fitting. https://www.asc.ohio-state.edu/gan.1/teaching/spring04/Chapter6.pdf.
4	LMFIT: Non-Linear Least-Squares Minimization and Curve-Fitting for Python. https://lmfit.github.io/lmfit-py/.

## Sheet: Table S2
Table S2. Literatures for 232 adsorbents investigated in this work.
Literature number	Title	DOI	First author	Year
[1]	Liquid Phase Heteroepitaxial Growth of Moisture-Tolerant MOF-5 Isotype Thin Films and Assessment of the Sorption Properties by Quartz Crystal Microbalance	DOI: 10.1002/adfm.201302854	Suttipong Wannapaiboon	2013
[2]	Design of Hydrophilic Metal Organic Framework Water Adsorbents for Heat Reallocation	DOI: 10.1002/adma.201502418	Amandine Cadiau	2015
[3]	Enhancement of CO 2 Adsorption and CO 2 /N 2 Selectivity on ZIF-8 via Postsynthetic Modification	DOI: 10.1002/Aic.13970	Zhijuan Zhang	2013
[4]	Dynamic Structural Behavior and Anion-Responsive Tunable Luminescence of a Flexible Cationic Metal-Organic Framework	DOI: 10.1002/anie.201206724	Biplab Manna	2013
[5]	A Water Stable Metal-Organic Framework with Optimal Features for CO 2 Capture	DOI: 10.1002/anie.201302682	Qingyuan Yang	2013
[6]	Highly Hydrophobic Isoreticular Porous Metal-Organic Frameworks for the Capture of Harmful Volatile Organic Compounds	DOI: 10.1002/anie.201303484	Natalia M. Padial	2013
[7]	Ultra-Tuning of the Rare-Earth fcu-MOF Aperture Size for Selective Molecular Exclusion of Branched Paraffins	DOI: 10.1002/anie.201506345	Ayalew H. Assen	2015
[8]	A Robust Infinite Zirconium Phenolate Building Unit to Enhance the Chemical Stability of Zr MOFs	DOI: 10.1002/anie.201507058	Georges Mouchaham	2015
[9]	A Zeolite-Like Zinc Phosphonocarboxylate Framework and Its Transformation into Two- and Three-Dimensional Structures	DOI: 10.1002/asia.200700209	Zhenxia Chen	2007
[10]	Two Zn II Metal-Organic Frameworks with Coordinatively Unsaturated Metal Sites: Structures, Adsorption, and Catalysis	DOI: 10.1002/asia.201200601	Xiao-Ming Lin	2012
[11]	Chemical Property Change in a Metal-Organic Framework by Fluoro Functionality	DOI: 10.1002/bkcs.10087	Nakeun Ko	2015
[12]	Microporous Metal–Organic Framework Constructed from Heptanuclear Zinc Carboxylate Secondary Building Units	DOI: 10.1002/chem.200500963	Qian-Rong Fang	2006
[13]	A Porous Coordination Polymer with Accessible Metal Sites and its Complementary Coordination Action	DOI: 10.1002/chem.200802730	Hirotoshi Sakamoto	2009
[14]	Flexible Metal-Organic Framework with Hydrophobic Pores	DOI: 10.1002/chem.201103078	Lin-Hua Xie	2011
[15]	A Robust Porous Metal-Organic Framework with a New Topology That Demonstrates Pronounced Porosity and High-Efficiency Sorption/Selectivity Properties of Small Molecules	DOI: 10.1002/chem.201103687	Huanhuan Li	2012
[16]	Decametallic Co II -Cluster-Based Microporous Magnetic Framework with a Semirigid Multicoordinating Ligand	DOI: 10.1002/chem.201204458	Jumei Tian	2013
[17]	A New Synthetic Route to Microporous Silica with Well-Defined Pores by Replication of a Metal-Organic Framework	DOI: 10.1002/chem.201501599	Atsushi Kondo	2015
[18]	Topological Diversity, Adsorption and Fluorescence Properties of MOFs Based on a Tetracarboxylate Ligand	DOI: 10.1002/ejic.201000415	Ronny Grünker	2010
[19]	Two 3D Supramolecular Isomeric Mixed-Ligand Co II Frameworks - Guest-Induced Structural Variation, Magnetism, and Selective Gas Adsorption	DOI: 10.1002/ejic.201200851	Dan Liu	2012
[20]	On the Physical Adsorption of Vapors by Microporous Carbons	DOI: 10.1006/jcis.1995.1018	R. H. Bradley	1995
[21]	Comparison of Gaseous Molecular Adsorption Properties of Microporous Manganese Oxides and Crystalline Aluminosilicates	DOI: 10.1006/jcis.2000.7399	Z. M. Wang	2001
[22]	Activated Carbon Oxygen Content Influence on Water and Surfactant Adsorption	DOI: 10.1006/jcis.2001.8052	Phillip Pendleton	2002
[23]	Adsorption of toluene and toluene–water vapor mixture on almond shell based activated carbons	DOI: 10.1007/s10450-013-9540-5	Alicia Martínez de Yuso	2013
[24]	Synthesis, structures and properties of three new compounds based on multidentate ligand containing triazole and pyrimidine	DOI: 10.1007/s40242-015-5051-0	Lei Lü	2015
[25]	Adsorption of water vapor by non-porous carbons	DOI: 10.1016/0008-6223(92)90080-g	P. J. M. Carrott	1992
[26]	Evaluation of confinement effects in zeolites under Henry's adsorption regime	DOI: 10.1016/j.apsusc.2009.12.067	Marc Pera-Titus	2010
[27]	CO2 adsorption and catalytic application of Co-MOF-74 synthesized by microwave heating	DOI: 10.1016/j.cattod.2011.08.019	Hye-Young Cho	2012
[28]	Adsorption/catalytic properties of MIL-125 and NH2-MIL-125	DOI: 10.1016/j.cattod.2012.08.014	Se-Na Kim	2013
[29]	Adsorption characteristics of nanoporous carbon–silica composites synthesized from graphite oxide by a mechanochemical intercalation method	DOI: 10.1016/j.jcis.2007.04.016	Y. H. Chu	2007
[30]	Adsorption of water on three-dimensional pillared-layer metal organic frameworks	DOI: 10.1016/j.jcis.2007.05.090	Atsushi Kondo	2007
[31]	Simulations of model metal-organic frameworks for the separation of carbon dioxide	DOI: 10.1016/j.egypro.2011.01.090	Brad A. Wells	2011
[32]	Water adsorption–desorption property of stable porous supramolecular assembly composed of discrete tetranuclear iron(III) complex using π⋯π interactions	DOI: 10.1016/j.ica.2012.02.002		2012
[33]	Grafting of hydrophilic ethylene glycols or ethylenediamine on coordinatively unsaturated metal sites in MIL-100(Cr) for improved water adsorption characteristics	DOI: 10.1016/j.ica.2013.07.024	Martin Wickenheisser	2013
[34]	A 3D POM–MOF composite based on Ni(ΙΙ) ion and 2,2′-bipyridyl-3,3′-dicarboxylic acid: Crystal structure and proton conductivity	DOI: 10.1016/j.jssc.2013.03.041	Meilin Wei	2013
[35]	Reversible flexible structural changes in multidimensional MOFs by guest molecules (I2, NH3) and thermal stimulation	DOI: 10.1016/j.jssc.2015.02.014	Yang Chen	2015
[36]	Characterisation of metal organic frameworks for adsorption cooling	DOI: 10.1016/j.ijheatmasstransfer.2012.07.068	Ahmed Rezk	2012
[37]	Design, structure and properties of a novel 3D metal-organic framework constructed from N-donor ligand supporting Cd(II)-carboxylate layer	DOI: 10.1016/j.inoche.2006.02.029	Ming Xue	2006
[38]	Adsorption–desorption of water vapour on chars prepared from commercial wood charcoals, in relation to their chemical composition, surface chemistry and pore structure	DOI: 10.1016/j.jaap.2010.03.005	J. Pastor-Villegas	2010
[39]	Sulfation of metal–organic frameworks: Opportunities for acid catalysis and proton conductivity	DOI: 10.1016/j.jcat.2011.04.015	Maarten G	2011
[40]	Characterization of metal-organic frameworks by water adsorption	DOI: 10.1016/j.micromeso.2008.11.020	Pia Küsgens	2009
[41]	Effect of functional groups in MIL-101 on water sorption behavior	DOI: 10.1016/j.micromeso.2012.01.015	George Akiyama	2012
[42]	Bench-scale preparation of Cu3(BTC)2 by ethanol reflux: Synthesis optimization and adsorption/catalytic applications	DOI: 10.1016/j.micromeso.2012.05.021	Jun Kim	2012
[43]	Thermogravimetric and adsorption studies of oxidized active carbons by using different probe molecules	DOI: 10.1016/s0040-6031(99)00375-5	Zuojiang Li	2000
[44]	Binary mixture adsorption of water and ethanol on silicalite	DOI: 10.1016/S0167-2991(02)80329-9	Y. Oumi	2002
[45]	Single-component gas phase adsorption and desorption studies using a tapered element oscillating microbalance	DOI: 10.1016/S1387-1811(02)00428-6	Arjan Giaya	2002
[46]	Defect Control To Enhance Proton Conductivity in a Metal–Organic Framework	DOI: 10.1021/acs.chemmater.5b00665	Jared M. Taylor	2015
[47]	Hydrostable and Nitryl/Methyl-Functionalized Metal–Organic Framework for Drug Delivery and Highly Selective CO2Adsorption	DOI: 10.1021/acs.inorgchem.5b00335	De-Yun Ma	2015
[48]	H2O Adsorption/Desorption in MOF-74:Ab InitioMolecular Dynamics and Experiments	DOI: 10.1021/acs.jpcc.5b02069	Yunsong Li	2015
[49]	Solubility of Gases in Water Confined in Nanoporous Materials: ZSM-5, MCM-41, and MIL-100	DOI: 10.1021/acs.jpcc.5b06660	Linh Ngoc Ho	2015
[50]	Three-Dimensional Robust Porous Coordination Polymer with Schiff Base Site on the Pore Wall: Synthesis, Single-Crystal-to-Single-Crystal Reversibility, and Selective CO2Adsorption	DOI: 10.1021/Cg2004672	Rajdip Dey	2011
[51]	Variable Water Adsorption in Amino Acid Derivative Based Homochiral Metal Organic Frameworks	DOI: 10.1021/Cg3008443	Tanay Kundu	2012
[52]	A CdSO4-Type 3D Metal–Organic Framework Showing Coordination Dynamics on Cu2+Axial Sites: Vapochromic Response and Guest Sorption Selectivity	DOI: 10.1021/Cg3017563	Guo-Bi Li	2013
[53]	A Series of Three-Dimensional Lanthanide Coordination Compounds with the Rutile Topology	DOI: 10.1021/Cg800204q	Xiaojun Zhao	2009
[54]	Immobilization of Alkali Metal Ions in a 3D Lanthanide-Organic Framework: Selective Sorption and H2Storage Characteristics	DOI: 10.1021/Cm9014749	Sudip Mohapatra	2009
[55]	Investigation of Porous Ni-Based Metal–Organic Frameworks Containing Paddle-Wheel Type Inorganic Building Units via High-Throughput Methods	DOI: 10.1021/Ic200381f	Palanikumar Maniam	2011
[56]	A Vanadium (VO2+) Metal–Organic Framework: Selective Vapor Adsorption, Magnetic Properties, and Use as a Precursor for a Polyoxovanadate	DOI: 10.1021/Ic200463k	Prakash Kanoo	2011
[57]	Flexible and Hydrophobic Zn-Based Metal–Organic Framework	DOI: 10.1021/ic200937u	Ines Maria Hauptvogel	2011
[58]	Bistable Dynamic Coordination Polymer Showing Reversible Structural and Functional Transformations	DOI: 10.1021/Ic301481p	Sanjog S	2012
[59]	Gas Storage in a Partially Fluorinated Highly Stable Three-Dimensional Porous Metal–Organic Framework	DOI: 10.1021/ic302645rb	Atanu Santra	2013
[60]	Third-Generation Breathing Metal–Organic Framework with Selective, Stepwise, Reversible, and Hysteretic Adsorption Properties	DOI: 10.1021/Ic402095u	Suresh Sanda	2013
[61]	Stoichiometry-Controlled Two Flexible Interpenetrated Frameworks: Higher CO2Uptake in a Nanoscale Counterpart Supported by Accelerated Adsorption Kinetics	DOI: 10.1021/Ic500234r	Nivedita Sikdar	2014
[62]	Conformation-Controlled Sorption Properties and Breathing of the Aliphatic Al-MOF [Al(OH)(CDC)]	DOI: 10.1021/Ic500288w	Felicitas Niekiel	2014
[63]	Effect of Water Adsorption on Retention of Structure and Surface Area of Metal–Organic Frameworks	DOI: 10.1021/Ie202325p	Paul M. Schoenecker	2012
[64]	Zn(tbip) (H2tbip= 5-tert-Butyl Isophthalic Acid): A Highly Stable Guest-Free Microporous Metal Organic Framework with Unique Gas Separation Capability	DOI: 10.1021/Ja057667b	Long Pan	2006
[65]	A Porous Framework Polymer Based on a Zinc(II) 4,4‘-Bipyridine-2,6,2‘,6‘-tetracarboxylate: Synthesis, Structure, and “Zeolite-Like” Behaviors	DOI: 10.1021/Ja060946u	Xiang Lin	2006
[66]	Reversible Water-Induced Magnetic and Structural Conversion of a Flexible Microporous Ni(II)Fe(III) Ferromagnet	DOI: 10.1021/Ja069166b	Nobuhiro Yanai	2007
[67]	Explanation of the Adsorption of Polar Vapors in the Highly Flexible Metal Organic Framework MIL-53(Cr)	DOI: 10.1021/ja1023282	Sandrine Bourrelly	2010
[68]	A Sodalite-Type Porous Metal−Organic Framework with Polyoxometalate Templates: Adsorption and Decomposition of Dimethyl Methylphosphonate	DOI: 10.1021/Ja109659k	Feng-Ji Ma	2011
[69]	Super Flexibility of a 2D Cu-Based Porous Coordination Framework on Gas Adsorption in Comparison with a 3D Framework of Identical Composition: Framework Dimensionality-Dependent Gas Adsorptivities	DOI: 10.1021/Ja201170c	Atsushi Kondo	2011
[70]	Hydroxyl Group Recognition by Hydrogen-Bonding Donor and Acceptor Sites Embedded in a Layered Metal–Organic Framework	DOI: 10.1021/Ja203291n	Masaaki Sadakiyo	2011
[71]	Capture of Nerve Agents and Mustard Gas Analogues by Hydrophobic Robust MOF-5 Type Metal–Organic Frameworks	DOI: 10.1021/Ja2042113	Carmen Montoro	2011
[72]	Helical Water Chain Mediated Proton Conductivity in Homochiral Metal–Organic Frameworks with Unprecedented Zeoliticunh-Topology	DOI: 10.1021/Ja2078637	Subash Chandra Sahoo	2011
[73]	Enhancing Water Stability of Metal–Organic Frameworks via Phosphonate Monoester Linkers	DOI: 10.1021/Ja306812r	Jared M. Taylor	2012
[74]	Water Adsorption in Porous Metal–Organic Frameworks and Related Materials	DOI: 10.1021/Ja500330a	Hiroyasu Furukawa	2014
[75]	Adsorption Isotherms of Water, Propan-2-ol, and Methylbenzene Vapors on Grade 03 Silica Gel, Sorbonorit 4 Activated Carbon, and HiSiv 3000 Zeolite	DOI: 10.1021/je400517c	Józef Nastaj	2013
[76]	Uncommon Adsorption Isotherm of Methanol on a Hydrophobic Y-zeolite	DOI: 10.1021/Jp0103530	Istvan Halasz	2001
[77]	Molecular Understanding for the Adsorption of Water and Alcohols in Hydrophilic and Hydrophobic Zeolitic Metal−Organic Frameworks	DOI: 10.1021/Jp1033273	Anjaiah Nalaparaju	2010
[78]	Molecular Simulation of Water/Alcohol Mixtures’ Adsorption and Diffusion in Zeolite 4A Membranes	DOI: 10.1021/Jp805923k	Jian Yang Wu	2009
[79]	Probing the Mechanism of Water Adsorption in Carbon Micropores with Multitemperature Isotherms and Water Preadsorption Experiments	DOI: 10.1021/la061140a	S. W. Rutherford	2006
[80]	CO2/H2O Adsorption Equilibrium and Rates on Metal−Organic Frameworks: HKUST-1 and Ni/DOBDC	DOI: 10.1021/La102359q	Jian Liu	2010
[81]	Electron Microscopic Study on Aerosol-Assisted Synthesis of Aluminum Organophosphonates Using Flexible Colloidal PS-b-PEO Templates	DOI: 10.1021/La302695q	Tatsuo Kimura	2012
[82]	Adjusting the Stability of Metal–Organic Frameworks under Humid Conditions by Ligand Functionalization	DOI: 10.1021/La304151r	Himanshu Jasuja	2012
[83]	Synthesis of Cobalt-, Nickel-, Copper-, and Zinc-Based, Water-Stable, Pillared Metal–Organic Frameworks	DOI: 10.1021/La503269f	Himanshu Jasuja	2014
[84]	Reversible Structural Change of Cu-MOF on Exposure to Water and Its CO2 Adsorptivity	DOI: 10.1021/la803818p	Yan Cheng	2009
[85]	Experimental Study of Water Adsorption on Activated Carbons	DOI: 10.1021/la980492h	Issa I. Salame	1999
[86]	A flexible interpenetrating coordination framework with a bimodal porous functionality	DOI: 10.1038/Nmat1827	Tapas Kumar Maji	2007
[87]	Selective guest sorption in an interdigitated porous framework with hydrophobic pore surfaces	DOI: 10.1039/B703502k	Satoshi Horike	2007
[88]	A cubic coordination framework constructed from benzobistriazolate ligands and zinc ions having selective gas sorption properties	DOI: 10.1039/B904280f	Shyam Biswas,	2009
[89]	Enhanced selectivity of CO2 from a ternary gas mixture in an interdigitated porous framework	DOI: 10.1039/C0cc00027b	Keiji Nakagawa	2010
[90]	A microporous luminescent metal–organic framework for highly selective and sensitive sensing of Cu2+ in aqueous solution	DOI: 10.1039/C0cc00148a	Yunqing Xiao	2010
[91]	Construction of a trigonal bipyramidal cage-based metal–organic framework with hydrophilic pore surface via flexible tetrapodal ligands	DOI: 10.1039/C0cc02496a	Tian-Fu Liu	2010
[92]	Single-crystal-to-single-crystal transformations and selective adsorption of porous copper(ii) frameworks	DOI: 10.1039/C0cc04689b	Man-Sheng Chen	2011
[93]	Selective carbon dioxide uptake and crystal-to-crystal transformation: porous 3D framework to 1D chain triggered by conformational change of the spacer	DOI: 10.1039/C1ce05847a	Ritesh Haldar	2012
[94]	CO2capture and conversion using Mg-MOF-74 prepared by a sonochemical method	DOI: 10.1039/C1ee02234b	Da-Ae Yang	2012
[95]	A microporous metal–organic framework with high stability for GC separation of alcohols from water	DOI: 10.1039/C2cc33023g	Tsolmon Borjigin	2012
[96]	Post-synthesis functionalization of MIL-101 using diethylenetriamine: a study on adsorption and catalysis	DOI: 10.1039/C2ce06608d	Se-Na Kim	2012
[97]	Controlled modification of the inorganic and organic bricks in an Al-based MOF by direct and post-synthetic synthesis routes	DOI: 10.1039/C2ce06620c	Tim Ahnfeldt	2012
[98]	Two ligand-functionalized Pb(ii) metal–organic frameworks: structures and catalytic performances	DOI: 10.1039/C2dt30935a	Xiao-Ming Lin	2012
[99]	Carbon dioxide adsorption by physisorption and chemisorption interactions in piperazine-grafted Ni2(dobdc) (dobdc = 1,4-dioxido-2,5-benzenedicarboxylate)	DOI: 10.1039/C2dt31112g	Anita Das	2012
[100]	A robust microporous metal–organic framework constructed from a flexible organic linker for highly selective sorption of methanol over ethanol and water	DOI: 10.1039/C2jm15604k	Qian Huang	2012
[101]	Reversible solid-state hydration and dehydration process involving anion transfer in a self-assembled Cu2 system	DOI: 10.1039/C2ra21865h	T. Washizaki	2012
[102]	A charge-polarized porous metal–organic framework for gas chromatographic separation of alcohols from water	DOI: 10.1039/C3cc38260e	Jian-Ke Sun	2013
[103]	Polyoxometalate-based purely inorganic porous frameworks with selective adsorption and oxidative catalysis functionalities	DOI: 10.1039/C3cc40990b	Ding Liu	2013
[104]	Environmentally friendly synthesis of highly hydrophobic and stable MIL-53 MOF nanomaterials	DOI: 10.1039/C3cc42287a	Jia Liu	2013
[105]	An unusual highly connected 3D net with hydrophilic pore surface	DOI: 10.1039/C3ce26788a	Huabin Zhang	2013
[106]	Toxic gas removal – metal–organic frameworks for the capture and degradation of toxic gases and vapours	DOI: 10.1039/C3cs60475f	Elisa Barea	2014
[107]	Selective CO2 adsorption and proton conductivity in the two-dimensional Zn(ii) framework with protruded water molecules and flexible ether linkers	DOI: 10.1039/C3dt50896j	Won Ju Phang	2013
[108]	Zn(ii) coordination polymer of an in situ generated 4-pyridyl (4Py) attached bis(amido)phosphate ligand, [PO2(NH4Py)2]− showing preferential water uptake over aliphatic alcohols	DOI: 10.1039/C3dt51123e	Arvind K. Gupta,	2013
[109]	Postsynthetic tuning of hydrophilicity in pyrazolate MOFs to modulate water adsorption properties	DOI: 10.1039/C3ee40876k	Casey R. Wade	2013
[110]	Synthesis of reduced graphene oxide/phenolic resin-based carbon composite ultrafine fibers and their adsorption performance for volatile organic compounds and water	DOI: 10.1039/c3ta10545h	Yu Bai	2013
[111]	Water adsorption in MOFs: fundamentals and applications	DOI: 10.1039/C4cs00078a	Jérôme Canivet	2014
[112]	A highly stable multifunctional three-dimensional microporous framework: excellent selective sorption and visible photoluminescence	DOI: 10.1039/C4dt00230j	Yumei Huang	2014
[113]	Manufacture of dense CAU-10-H coatings for application in adsorption driven heat pumps: optimization and characterization	DOI: 10.1039/c5ce00789e	M. F. de Lange	2015
[114]	New layered copper 1,3,5-benzenetriphosphonates pillared with N-donor ligands: their synthesis, crystal structures, and adsorption properties	DOI: 10.1039/c5dt01137j	Atsushi Kondo	2015
[115]	Water stable triazolyl phosphonate MOFs: steep water uptake and facile regeneration	DOI: 10.1039/c5dt02651b	S. Begum	2015
[116]	Rational design of a pyrene based luminescent porous supramolecular framework: excimer emission and energy transfer	DOI: 10.1039/c5ra14267a	Komal Prasad	2015
[117]	Synthesis, Structure, and Properties of a Chiral Zinc(II) Metal-Organic Framework Featuring Linear Trinuclear Secondary Building Blocks	DOI: 10.1071/Ch12270	Zilu Chen	2012
[118]	A porous Cu(II)-MOF containing [PW12O40]3−and a large protonated water cluster: synthesis, structure, and proton conductivity	DOI: 10.1080/00958972.2014.957689	Meilin Wei	2014
[119]	Adsorption of Radon and Water Vapor on Commercial Activated Carbons	DOI: 10.1080/01496399508225610	Neguib M. Hassan	1995
[120]	Molecular Simulation Study on Adsorption and Diffusion Behavior of Ethanol/Water Molecules in NaA Zeolite Crystal	DOI: 10.1252/Jcej.37.67	Shin-ichi Furukawa	2004
[121]	Dependence of Water Vapour Adsorption on the Polarity of the Graphene Surfaces of Multi-wall Carbon Nanotubes	DOI: 10.1260/0263-6174.28.10.903	Robert Bradley	2010
[122]	Enhanced Adsorption of Methanol by Oxidised Nutshell Carbon	DOI: 10.1260/0263617001493422	Alan Bailey	2000
[123]	A microporous Zn(ii)–MOF with open metal sites: structure and selective adsorption properties	DOI: 10.1039/C4dt00307a	Xiaofang Zheng	2014

## Sheet: Table S3
Table S3. Structural characteristics of adsorbents collected from literatures.
Number	Adsorbent	Literature	Species	Sa (m2/g)	Va (cm3/g)	Dp (Å)
Carb-1	293WVA 1100 oxidized	[85]	Carbon	1330	0.521	25 c3)
Carb-2	Activated Carbon AT400R1t75	[23]	Carbon	1128	0.644	12 c3)
Carb-3	Activated Carbon AT467R117t45	[23]	Carbon	1117	0.675	12 c3)
Carb-4	Activated Carbon AT600R1t30	[23]	Carbon	926	0.557	12 c3)
Carb-5	Activated Carbon AT800R15t120	[23]	Carbon	990	0.656	12 c3)
Carb-6	Activated PVDC Carbon S850	[20]	Carbon	n.d.	0.41	6.8 c1)
Carb-7	BD-Carbon	[119]	Carbon	294	0.41	24 c1)
Carb-8	BPL-Carbon	[119]	Carbon	823	0.57	26 c1)
Carb-9	Carbon	[42]	Carbon	n.d.	n.d.	n.d.
Carb-10	Carbon AG5	[43]	Carbon	880	0.48	n.d.
Carb-11	Carbon AG5-H2O2	[43]	Carbon	922	0.51	n.d.
Carb-12	Carbon AG5-HClO4	[43]	Carbon	459	0.2	n.d.
Carb-13	Carbon AG5-HNO3	[43]	Carbon	993	0.54	n.d.
Carb-14	Carbon AG5-HNO3 (356K)	[43]	Carbon	497	0.28	n.d.
Carb-15	Carbon Molecular Sieve	[79]	Carbon	n.d.	0.32 b1)	5 c1)
Carb-16	Carbon WD	[43]	Carbon	1194	0.48	n.d.
Carb-17	Carbon WD-H2O2	[43]	Carbon	1018	0.44	n.d.
Carb-18	Carbon WD-HClO4	[43]	Carbon	991	0.43	n.d.
Carb-19	Carbon WD-HNO3 (356K)	[43]	Carbon	958	0.42	n.d.
Carb-20	Charcoal	[122]	Carbon	n.d.	0.31 b1)	n.d.
Carb-21	Coal based steam activated carbon	[22]	Carbon	1207	0.95	n.d.
Carb-22	Coconut based steam activated carbon	[22]	Carbon	1408	0.76	n.d.
Carb-23	Eucalyptus Charcoal	[38]	Carbon	111	0.407 b2)	5.4 c1)
Carb-24	Eucalyptus Charcoal heated to 1273K	[38]	Carbon	735	0.666 b2)	5.2 c1)
Carb-25	Holm-Oak Charcoal	[38]	Carbon	640	0.864 b2)	5.6 c1)
Carb-26	Holm-Oak Charcoal heated to 1023K	[38]	Carbon	n.d.	0.941 b2)	n.d.
Carb-27	MWCNT	[121]	Carbon	59.2	0.24	n.d.
Carb-28	NPC E0	[25]	Carbon	37.5	n.d.	n.d.
Carb-29	NPC E1	[25]	Carbon	35.4	n.d.	n.d.
Carb-30	PCB-Carbon	[119]	Carbon	663	0.58	41.7 c1)
Carb-31	Sonicated Fenton MWCNT	[121]	Carbon	60.4	0.24	n.d.
Carb-32	Sorbonorit 4 Activated Carbon	[75]	Carbon	1400	0.1686 b1)	5.9 c1)
Carb-33	Wood based phosphoric acid activated carbon	[22]	Carbon	1615	1.2	n.d.
Carb-34	WVA 1100	[85]	Carbon	1710	0.645	25 c3)
Carb-35	Xtrusorb	[85]	Carbon	1040	0.467	11 c3)
Carb-36	Xtrusorb oxidized	[85]	Carbon	980	0.437	11 c3)
Comp-1	GOC16Si-1-823	[29]	Composite-carbon/silica composite	446	0.37	n.d.
Comp-2	GOC16Si-22-823	[29]	Composite-carbon/silica composite	970	0.6	n.d.
Comp-3	GOC16Si-6-823	[29]	Composite-carbon/silica composite	974	0.6	n.d.
Comp-4	C24H39N4O60Ni2PW12	[34]	Composite-POM/MOF composite	n.d.	n.d.	n.d.
Comp-5	Carbonized Fiber PCF	[110]	Composite-RGO/carbon composite	617	0.262	12 c2)
Comp-6	Carbonized Fiber PCGF-H	[110]	Composite-RGO/carbon composite	588	0.26	5 c1)
Comp-7	Carbonized Fiber PCGF-N	[110]	Composite-RGO/carbon composite	620	0.264	12 c2)
M-1	(H2dab)[Zn2(ox)3]	[70]	MOF	n.d.	n.d.	n.d.
M-2	[{Zn(L)(H2O)2}(NO3)2*2H2O]n	[4]	MOF	n.d.	n.d.	n.d.
M-3	[Cd(mpto)2.CH3CH2OH]n	[24]	MOF	25.8	n.d.	n.d.
M-4	[Co2(BDC)2(BPNO)]*H2BDC*2MeOH	[19]	MOF	n.d.	n.d.	5.8 c2)
M-5	[Co3(ndc)-(HCOO)3(mu3-OH)(H2O)]n	[15]	MOF	1386	0.58	13.6 c2)
M-6	[Cu(INA)2(NH3)2(H2O)2]	[35]	MOF	n.d.	n.d.	n.d.
M-7	[Cu(INA)2]	[35]	MOF	164.4	n.d.	4.99 c2)
M-8	[Cu(INAIP)]*2H2O	[92]	MOF	n.d.	n.d.	n.d.
M-9	[Cu2(H2btp)(H2O)2(12-bis(4-pyridl)ethylene)]	[114]	MOF	2.8	0.095	13.4 c2)
M-10	[Cu2(H2btp)(H2O)2(13-bis(4-pyridl)propane)]	[114]	MOF	3	0.083	14 c2)
M-11	[Cu2(H2btp)(H2O)2(bipyridine)]	[114]	MOF	1.1	0.047	11.2 c2)
M-12	[Cu2(pzdc)2(pyz)]*2H2O}	[30]	MOF	n.d.	n.d.	6 c2)
M-13	[Mn(mpto)2.CH3CH2OH]2	[24]	MOF	86.2	n.d.	n.d.
M-14	[Ni(dipn)]2[Ni(dipn)(H2O)][Fe(CN)6]2.2H2O	[66]	MOF	n.d.	n.d.	n.d.
M-15	[Ni(pca)(bdc)0.5(H2O)2]	[58]	MOF	n.d.	n.d.	n.d.
M-16	[Ni8(L5)6]	[6]	MOF	2215	n.d.	n.d.
M-17	[Ni8(L5-CF3)6]	[6]	MOF	1985	n.d.	n.d.
M-18	[Ni8(L5-CH3)6]	[106]	MOF	n.d.	n.d.	n.d.
M-19	[PbL2]*2DMF*6H2O	[98]	MOF	n.d.	n.d.	13 c2)
M-20	[PbL2]*DMF*2H2O	[98]	MOF	n.d.	n.d.	13 c2)
M-21	[Zn(NO2-BDC)(dmbpy).5](C2H6O)(H2O)	[47]	MOF	925	n.d.	9 c3)
M-22	[Zn2(ip)2(bpy)2]*DMF}n	[87]	MOF	300	n.d.	6 c2)
M-23	[Zn3(TCPB)2*2H2O]*2H2O*4DMF	[10]	MOF	573	n.d.	4.3 c3)
M-24	[Zn4O(mipcapz)3]n on [Zn4O(dmcapz)3]n	[1]	MOF	640	0.279	n.d.
M-25	{(H2PIP)0.5[VO(CEP)]*H2O}	[56]	MOF	n.d.	n.d.	n.d.
M-26	{[Cu(azpy)(glut)](H2O)2}	[50]	MOF	131 a)	n.d.	7.8 c2)
M-27	{[Cu2(4-pmpmd)2(CH3OH)4(opd)2]*2H2O}	[52]	MOF	n.d.	n.d.	6.48 c2)
M-28	{[Cu2(pzdc)2(bpy)]*4H2O}	[30]	MOF	n.d.	n.d.	9 c2)
M-29	{[Dy(ox)(Bpybc)(H2O)]*OH*13H2O}n	[102]	MOF	n.d.	n.d.	8.4 c2)
M-30	{[Ni(bpe)2(N(CN)2)](N(CN)2)}n	[86]	MOF	n.d.	n.d.	6.78 c2)
M-31	{[Zn-(C10H2O8)0.5(C10S2N2H8)]*5H2O]}n	[60]	MOF	n.d.	n.d.	12.7 c2)
M-32	{[Zn(oxo-pba)2(bpy)]4H2O}n	[116]	MOF	n.d.	n.d.	6.2 c2)
M-33	{[Zn2(bpdc)2(azpy)]*2H2O*2DMF}n	[61]	MOF	235	n.d.	8.2 c2)
M-34	{[Zn2(bpdc)2(azpy)]*2H2O*2DMF}n Nanoscale	[61]	MOF	385	n.d.	n.d.
M-35	{[Zn3(bpdc)3(azpy)]*4H2O*2DEF}n	[61]	MOF	200	n.d.	11.9 c2)
M-36	{[Zn4O(bfbpdc)3-(bpy)0.5(H2O)]*(3DMF)(H2O)}n	[59]	MOF	1450	0.59	10.76 c2)
M-37	{[ZnL(HCO2)(H2O)]*DMF}	[108]	MOF	n.d.	n.d.	n.d.
M-38	1 C76H116N14O42Zn3	[117]	MOF	n.d.	n.d.	n.d.
M-39	1-LiCl	[111]	MOF	n.d.	n.d.	n.d.
M-40	2D [Cu(bpy)2(OTf)2]n	[69]	MOF	740	0.295	n.d.
M-41	Blucher-101408	[106]	MOF	n.d.	n.d.	n.d.
M-42	Bu-FeCr	[111]	MOF	n.d.	n.d.	n.d.
M-43	C10H4O12Eu2	[90]	MOF	n.d.	n.d.	5 c2)
M-44	C115.5H202N14O43Zn4	[91]	MOF	n.d.	n.d.	13 c2)
M-45	C11H15BrN2O4Zn	[72]	MOF	n.d.	n.d.	n.d.
M-46	C11H15ClN2O4Zn	[72]	MOF	n.d.	n.d.	n.d.
M-47	C12H17ClN2O3Cd	[51]	MOF	n.d.	n.d.	9.8 c2)
M-48	C15H27N2O10Dy	[53]	MOF	n.d.	n.d.	10.4 c2)
M-49	C15H27N2O10Er	[53]	MOF	n.d.	n.d.	10.4 c2)
M-50	C15H27N2O10Ho	[53]	MOF	n.d.	n.d.	10.4 c2)
M-51	C15H27N2O10Tb	[53]	MOF	n.d.	n.d.	10.4 c2)
M-52	C15H27N2O10Tm	[53]	MOF	n.d.	n.d.	10.4 c2)
M-53	C18H21Br2N4O9Cd2	[51]	MOF	n.d.	n.d.	12 c2)
M-54	C24H40N2O16Cl2Cd3	[37]	MOF	n.d.	0.07	8.4 c2)
M-55	C26H24Br2Cu2N8O3	[101]	MOF	n.d.	n.d.	n.d.
M-56	C28H24CoN10	[93]	MOF	137	n.d.	6 c2)
M-57	C32H24Cu3N6O12	[13]	MOF	445	n.d.	9.8 c2)
M-58	C32H46N4O8Zn	[100]	MOF	n.d.	n.d.	7.21 c2)
M-59	C4H8HoKO12 Dehydrated	[54]	MOF	69.1 a)	0.1042	3.6 c2)
M-60	C55H52Fe4N20O18	[32]	MOF	n.d.	n.d.	n.d.
M-61	C62H44N2O8Zn2	[57]	MOF	960	0.43	10.5 c2)
M-62	C62H50Cd3K2N2O26	[105]	MOF	8.27	n.d.	12.7 c2)
M-63	C9H11ClN2O4Cd	[51]	MOF	n.d.	n.d.	n.d.
M-64	CALF-25	[73]	MOF	385	n.d.	4.6 c2)
M-65	CAU-10-CH3	[111]	MOF	n.d.	n.d.	n.d.
M-66	CAU-10-H	[111]	MOF	600	0.26	7 c2)
M-67	CAU-10-NH2	[111]	MOF	n.d.	n.d.	n.d.
M-68	CAU-10-NO2	[111]	MOF	440	0.18	n.d.
M-69	CAU-10-OCH3	[111]	MOF	n.d.	n.d.	n.d.
M-70	CAU-10-OH	[111]	MOF	n.d.	n.d.	n.d.
M-71	CAU-10-pydc	[2]	MOF	926	0.43	n.d.
M-72	CAU-13	[62]	MOF	380	0.15	n.d.
M-73	CAU-1-NH2	[97]	MOF	1530	0.64	n.d.
M-74	CAU-1-NHCH3	[97]	MOF	1340	0.53	n.d.
M-75	CAU-1-NHCOCH3	[97]	MOF	680	0.3	n.d.
M-76	Cd (II)-MOF [Cd(L)(DMF)]	[112]	MOF	231.31	n.d.	6 c2)
M-77	CID-3	[89]	MOF	n.d.	n.d.	8.1 c2)
M-78	Cobalt Triazolyl Phosphonate MOF	[115]	MOF	n.d.	n.d.	13 c1)
M-79	Cobalt Triazolyl Phosphonate MOF (95%RH)	[115]	MOF	n.d.	n.d.	13 c1)
M-80	Cobalt Triazolyl Phosphonate MOF (Activated at 403K)	[115]	MOF	n.d.	n.d.	13 c1)
M-81	Co-MOF-74(M)	[27]	MOF	1314	0.51	12 c1)
M-82	Co-MOF-74(S)	[27]	MOF	1327	0.52	12 c1)
M-83	CPO-27-Ni	[99]	MOF	n.d.	n.d.	11 c1)
M-84	Cr-MIL(101)	[111]	MOF	3124	1.58	34 c2)
M-85	Cr-MIL-101-NO2	[111]	MOF	2146	1.19	34 c2)
M-86	CuBTC	[42]	MOF	1507	n.d.	n.d.
M-87	Cu-MOF	[84]	MOF	n.d.	n.d.	n.d.
M-88	DETA-MIL-101	[96]	MOF	1560	1.1	n.d.
M-89	DMOF-Cl2	[82]	MOF	1175	0.45	3.8 c2)
M-90	DMOF-NO2	[82]	MOF	1310	0.53	6.2 c2)
M-91	DMOF-OH	[82]	MOF	1130	0.54	7.5 c2)
M-92	DUT-10(Zn)	[18]	MOF	423	n.d.	n.d.
M-93	DUT-4	[40]	MOF	1360	0.79	8.5 c2)
M-94	DUT-67	[74]	MOF	1560	0.6	16.6 c2)
M-95	ED-ZIF-8	[3]	MOF	1428	0.75	45.3 c2)
M-96	Et-MnCr	[111]	MOF	n.d.	n.d.	n.d.
M-97	HKUST-1-F	[11]	MOF	1404	n.d.	n.d.
M-98	JUC-110	[95]	MOF	n.d.	n.d.	4.5 c2)
M-99	Lanthanum Triazolyl Phosphonate MOF	[115]	MOF	n.d.	n.d.	19 c1)
M-100	Me-FeCr	[111]	MOF	n.d.	n.d.	n.d.
M-101	MFU-4	[88]	MOF	1611	0.42 b1)	n.d.
M-102	Mg-CPO-27	[111]	MOF	1400	0.65	11 c1)
M-103	Mg-MOF-74©	[94]	MOF	1525	0.62	11 c1)
M-104	MIL-100	[36]	MOF	1600	n.d.	n.d.
M-105	MIL-100(Cr)	[49]	MOF	1871	1.02	29 c1)
M-106	MIL-100(Cr)-DEG	[33]	MOF	580	0.5	12 c3)
M-107	MIL-100(Cr)-EG	[33]	MOF	710	0.47	12 c3)
M-108	MIL-100(Cr)-EN	[33]	MOF	640	0.42	15 c3)
M-109	MIL-100(Cr)-TEG	[33]	MOF	680	0.53	12 c3)
M-110	MIL-100(Fe)	[40]	MOF	1549	0.82	29 c2)
M-111	MIL-101-NH2	[41]	MOF	2509	1.27	34 c2)
M-112	MIL-101-SO3H	[41]	MOF	1920	0.94	34 c2)
M-113	MIL-125	[28]	MOF	1510	0.68	n.d.
M-114	MIL-125-NH2	[111]	MOF	1220	0.55	12 c2)
M-115	MIL-160	[2]	MOF	1070	0.398	5 c2)
M-116	MIL-163	[8]	MOF	170	n.d.	12 c2)
M-117	MIL-53(Al)ht	[104]	MOF	1489	0.56	8.5 c1)
M-118	MIL-53(Al)it	[104]	MOF	1031	0.72	34 c2)
M-119	MIL-53(Cr)	[67]	MOF	n.d.	n.d.	n.d.
M-120	NBu4	[111]	MOF	n.d.	n.d.	n.d.
M-121	NENU-11	[68]	MOF	572	0.39	n.d.
M-122	Ni3C87H118N12O29	[55]	MOF	n.d.	0.68	16 c1)
M-123	Ni-DOBDC	[80]	MOF	639	0.362	11 c1)
M-124	Pip-CPO-27-Ni	[99]	MOF	46.7	n.d.	n.d.
M-125	PIZOF-2	[74]	MOF	2080	0.88	17.6 c1)
M-126	pretreated a-Al	[113]	MOF	n.d.	n.d.	n.d.
M-127	pretreated m-Al	[113]	MOF	n.d.	n.d.	n.d.
M-128	SIM-1	[111]	MOF	470	0.23	6 c1)
M-129	S-MIL-53(Al)	[39]	MOF	n.d.	n.d.	n.d.
M-130	SNU-80	[14]	MOF	456	0.18	7 c2)
M-131	TAF-1a	[16]	MOF	268.5	n.d.	4.6 c1)
M-132	Ti(pyradine-2-carboxylic acid)	[11]	MOF	n.d.	n.d.	n.d.
M-133	UiO-66	[74]	MOF	1290	0.49	8.4 c2)
M-134	UiO-66(Zr)-(COOH)2	[5]	MOF	415	0.21	n.d.
M-135	UiO-66(Zr4+) with high concentration stearic acid	[46]	MOF	n.d.	0.574	6.5 c3)
M-136	UiO-66(Zr4+) with metal/ligand ratio 6:3	[46]	MOF	n.d.	0.45	6 c3)
M-137	UiO-66-NH2	[63]	MOF	1040	0.57	6 c1)
M-138	UMCM-1	[63]	MOF	6010	2.41	32 c2)
M-139	untreated a-Al	[113]	MOF	n.d.	n.d.	n.d.
M-140	untreated m-Al	[113]	MOF	n.d.	n.d.	n.d.
M-141	Y-fum-fcu-MOF	[7]	MOF	691	0.28	8 c3)
M-142	ZIF-8	[57]	MOF	n.d.	n.d.	n.d.
M-143	Zn(II)-MOF [Zn(HPylmDC)(DMA)]n	[123]	MOF	185.6	n.d.	4.425 c1)
M-144	Zn(L)(tdca)*1.5DMF	[118]	MOF	n.d.	n.d.	6.6 c2)
M-145	Zn(NDI-H)	[109]	MOF	1460	n.d.	16 c2)
M-146	Zn(NDI-NHEt)	[109]	MOF	1236	n.d.	n.d.
M-147	Zn(NDI-SEt)	[111]	MOF	888	n.d.	16 c1)
M-148	Zn(NDI-SO2Et)	[111]	MOF	764	n.d.	16 c1)
M-149	Zn(NDI-SOEt)	[111]	MOF	927	n.d.	16 c1)
M-150	Zn(NO3)2*6H2O	[12]	MOF	n.d.	0.17	17.3 c2)
M-151	Zn2C14N2O8H4	[65]	MOF	312.7	0.146	5.2 c1)
M-152	Zn3(TCPB)2(H2O)2	[107]	MOF	284	n.d.	4.3 c2)
M-153	Zn4O(dmcapz)3	[71]	MOF	840	0.45	6 c1)
M-154	Zn-BTTB-DMBPY	[83]	MOF	749	0.269	4.41 c1)
M-155	Zn-MOF-74(cycle 1)	[48]	MOF	n.d.	n.d.	n.d.
M-156	Zr-MOF-801-P	[74]	MOF	990	0.45	7.4 c2)
M-157	Zr-MOF-801-SC	[74]	MOF	690	0.27	7.4 c2)
M-158	Zr-MOF-802	[74]	MOF	20	0.01	5.6 c1)
M-159	Zr-MOF-804	[74]	MOF	1145	0.46	7.2 c2)
M-160	Zr-MOF-805	[74]	MOF	1230	0.48	9.5 c2)
M-161	Zr-MOF-806	[74]	MOF	2220	0.85	12.6 c2)
M-162	Zr-MOF-808	[74]	MOF	2060	0.84	18.4 c1)
M-163	Zr-MOF-841	[74]	MOF	1390	0.53	9.2 c1)
O-1	HMn8O16	[21]	Metal oxide	95	0.07	3 c1)
O-2	Na0.21H3.49Mn12O23	[21]	Metal oxide	112	0.1	2.8 c1)
O-3	AOP-CH2	[81]	MOP	170	0.42	n.d.
O-4	H[Ce(H2O)4]2[MnV13O38]*9NMP*17H2O	[103]	POM	1527	n.d.	n.d.
S-1	0.1TPABr-0.05Na20-SiO2-40H2O	[44]	Silicic	n.d.	n.d.	n.d.
S-2	0.1TPAOH-SiO2-40H20	[44]	Silicic	n.d.	n.d.	n.d.
S-3	0.36TPAOH-0.39HF-SIO2-34H20	[44]	Silicic	n.d.	n.d.	n.d.
S-4	Grade 03 Silica Gel	[75]	Silicic	780	0.514 b1)	2.2 c1)
S-5	Silica Gel	[36]	Silicic	840	n.d.	n.d.
S-6	Silicalite MFI	[45]	Silicic	n.d.	0.21	5.6 c2)
S-7	TPABr	[44]	Silicic	407	0.18	n.d.
S-8	TPAOH	[44]	Silicic	419	0.19	n.d.
S-9	TPAOH/HF	[44]	Silicic	391	0.17	n.d.
S-10	ZSM-5	[64]	Silicic	n.d.	n.d.	n.d.
S-11	HKUST-1 replica	[17]	Silicic	620	0.73	5.5 c3)
Z-1	CBV-901	[76]	Zeolite	n.d.	0.31	7.4 c3)
Z-2	H0.34Na0.06Al0.4Si47.6O96	[21]	Zeolite	340	0.24	4 c1)
Z-3	HiSiv 3000 Zeolite	[75]	Zeolite	282	0.1 b1)	15.2 c1)
Z-4	K6Na6Al12O48	[21]	Zeolite	756	0.57	4 c1)
Z-5	MCM-41	[49]	Zeolite	882	0.63	34 c1)
Z-6	Na-ZSM-5	[49]	Zeolite	366	0.18	6 c1)
Z-7	Zeolite 13X	[42]	Zeolite	n.d.	n.d.	n.d.
Z-8	Zeolite 4A	[78]	Zeolite	n.d.	n.d.	11.4 c1)
Z-9	Zeolite Na-A	[120]	Zeolite	n.d.	n.d.	n.d.
Z-10	Zn2(pbc)2*Hdma*H3O*2H2O	[9]	Zeolite	213 a)	n.d.	n.d.
n.d. represents "no data" . For Sa: a) Langmuir surface area; no superscript represents BET surface area. For Va: b1) pore volume measured basing on H2O adosrption at 298 K and relative pressure of 0.9; b2) pore volume measured using mercury intrusion method; no superscript default is based on N2 adsorption at 77 K. For Dp: c1) average pore diameter; c2) largest cavity diameter; c3) dominant pore…

## Sheet: Table S5
Table S5. Adsorption characteristics and heat pump performances of adsorbent-water working pairs in adsorption cooling/heating system.
Number	Adsorbent	Literature	Species	COPC	SCE (kJ/kg)	ΔWC (kg/kg)	COPH	SHE (kJ/kg)	ΔWH (kg/kg)	αa
Carb-1	293WVA 1100 oxidized	[85]	Carbon	0.610785	152.466	0.0637159	1.37557	257.786	0.0319202	0.2~0.3
Carb-2	Activated Carbon AT400R1t75	[23]	Carbon	0.406422	54.1751	0.0226399	1.0577	114.978	0.00132709	0.5~0.6
Carb-3	Activated Carbon AT467R117t45	[23]	Carbon	0.142192	13.6436	0.00570168	1.0033	118.56	0.0001825	0.9~1.0
Carb-4	Activated Carbon AT600R1t30	[23]	Carbon	0.685052	219.79	0.091851	1.2779	212.926	0.0215511	0.5~0.6
Carb-5	Activated Carbon AT800R15t120	[23]	Carbon	0.709993	253.239	0.105829	1.39136	261.183	0.0320277	0.6~0.7
Carb-6	Activated PVDC Carbon S850	[20]	Carbon	0.11669	9.39676	0.00392693	1.01121	102.979	7.60004e-05	0.4~0.5
Carb-7	BD-Carbon	[119]	Carbon	0.000323714	0.0210496	8.79668e-06	1.00004	95.01	1.69336e-06	0.6~0.7
Carb-8	BPL-Carbon	[119]	Carbon	1.17892e-05	0.000766323	3.20249e-07	1.00001	95.0044	4.96057e-07	0.6~0.7
Carb-9	Carbon	[42]	Carbon	0.211588	18.8585	0.00788102	1.00844	101.647	0.000398129	0.9~1.0
Carb-10	Carbon AG5	[43]	Carbon	0.548168	89.4543	0.0373832	1.09314	117.401	0.0046749	0.5~0.6
Carb-11	Carbon AG5-H2O2	[43]	Carbon	0.159983	15.0352	0.00628327	1.00486	108.504	0.000245648	0.5~0.6
Carb-12	Carbon AG5-HClO4	[43]	Carbon	0.531624	82.8723	0.0346326	1.09388	117.565	0.00470792	0.6~0.7
Carb-13	Carbon AG5-HNO3	[43]	Carbon	0.335186	38.3443	0.0160242	1.01748	110.208	0.000885733	0.5~0.6
Carb-14	Carbon AG5-HNO3 (356K)	[43]	Carbon	0.651784	188.864	0.0789269	1.39358	277.809	0.0359556	0.9~1.0
Carb-15	Carbon Molecular Sieve	[79]	Carbon	0.219071	19.6349	0.00820547	1.00393	98.9053	0.000181237	0.4~0.5
Carb-16	Carbon WD	[43]	Carbon	0.0114198	0.80371	0.000335873	1.00008	101.645	3.98016e-06	0.8~0.9
Carb-17	Carbon WD-H2O2	[43]	Carbon	0.13321	10.776	0.00450332	1.00461	101.086	0.000216823	0.7~0.8
Carb-18	Carbon WD-HClO4	[43]	Carbon	0.048765	3.62746	0.00151593	1.00076	103.136	3.68427e-05	0.6~0.7
Carb-19	Carbon WD-HNO3 (356K)	[43]	Carbon	0.508483	113.084	0.0472583	1.42385	353.135	0.0474995	0.0~0.1
Carb-20	Charcoal	[122]	Carbon	0.52123	80.4747	0.0336306	1.17033	141.112	0.00956909	0.6~0.7
Carb-21	Coal based steam activated carbon	[22]	Carbon	0.38931	46.4533	0.019413	1.15799	137.635	0.00856297	0.3~0.4
Carb-22	Coconut based steam activated carbon	[22]	Carbon	0.349853	38.4074	0.0160506	1.13793	131.043	0.00725362	0.3~0.4
Carb-23	Eucalyptus Charcoal	[38]	Carbon	0.509117	79.0443	0.0330329	1.13508	134.041	0.0073708	0.9~1.0
Carb-24	Eucalyptus Charcoal heated to 1273K	[38]	Carbon	0.185374	16.0436	0.00670468	1.25199	170.151	0.0151552	0.4~0.5
Carb-25	Holm-Oak Charcoal	[38]	Carbon	0.470694	65.0949	0.0272034	1.1906	149.998	0.0111227	0.9~1.0
Carb-26	Holm-Oak Charcoal heated to 1023K	[38]	Carbon	0.430462	54.5094	0.0227796	1.12489	129.217	0.0066662	0.9~1.0
Carb-27	MWCNT	[121]	Carbon	0.0124054	0.820167	0.00034275	1.01865	99.0218	0.000808277	0.0~0.1
Carb-28	NPC E0	[25]	Carbon	0.0410381	2.79694	0.00116885	1.02158	99.6578	0.000963569	0.8~0.9
Carb-29	NPC E1	[25]	Carbon	0.00736818	0.483395	0.000202012	1.00038	95.2019	1.70179e-05	0.9~1.0
Carb-30	PCB-Carbon	[119]	Carbon	0.00013122	0.00853081	3.56505e-06	1	95.0034	8.08048e-08	0.4~0.5
Carb-31	Sonicated Fenton MWCNT	[121]	Carbon	0.130368	10.6618	0.00445562	1.05731	112.339	0.00280573	0.0~0.1
Carb-32	Sorbonorit 4 Activated Carbon	[75]	Carbon	0.389587	45.4865	0.0190089	1.22783	161.262	0.0135797	0.6~0.7
Carb-33	Wood based phosphoric acid activated carbon	[22]	Carbon	0.535144	100.181	0.0418661	1.31857	215.677	0.0234667	0.2~0.3
Carb-34	WVA 1100	[85]	Carbon	0.523639	93.2636	0.0389751	1.27016	191.906	0.0187314	0.2~0.3
Carb-35	Xtrusorb	[85]	Carbon	0.230729	20.6077	0.00861203	1.07815	114.15	0.00380548	0.2~0.3
Carb-36	Xtrusorb oxidized	[85]	Carbon	0.530912	90.0215	0.0376202	1.21569	159.089	0.0129004	0.2~0.3
Comp-1	GOC16Si-1-823	[29]	Composite-carbon/silica composite	0.000209478	0.01362	5.69182e-06	1.00001	95.0086	6.35811e-07	0.5~0.6
Comp-2	GOC16Si-22-823	[29]	Composite-carbon/silica composite	0.00169351	0.11029	4.60903e-05	1.00057	95.12	2.45715e-05	0.8~0.9
Comp-3	GOC16Si-6-823	[29]	Composite-carbon/silica composite	0.00115083	0.0749022	3.13018e-05	1.00026	95.0595	1.14724e-05	0.6~0.7
Comp-4	C24H39N4O60Ni2PW12	[34]	Composite-POM/MOF composite	0.053906	3.72946	0.00155855	1.00981	97.0609	0.000417915	0.8~0.9
Comp-5	Carbonized Fiber PCF	[110]	Composite-RGO/carbon composite	0.262022	24.2019	0.010114	1.09532	118	0.00471337	0.4~0.5
Comp-6	Carbonized Fiber PCGF-H	[110]	Composite-RGO/carbon composite	0.00232976	0.153018	6.39467e-05	1.00001	95.7512	1.75929e-07	0.5~0.6
Comp-7	Carbonized Fiber PCGF-N	[110]	Composite-RGO/carbon composite	0.227198	20.7613	0.00867621	1.00402	96.9979	0.000182625	0.4~0.5
M-1	(H2dab)[Zn2(ox)3]	[70]	MOF	0.495627	91.9001	0.0384053	1.50435	405.27	0.0606638	0.7~0.8
M-2	[{Zn(L)(H2O)2}(NO3)2*2H2O]n	[4]	MOF	0.0765026	5.60062	0.00234052	1.00026	98.292	1.18183e-05	0.9~1.0
M-3	[Cd(mpto)2.CH3CH2OH]n	[24]	MOF	0.00791955	0.520001	0.00021731	1.00558	96.1881	0.000227544	0.5~0.6
M-4	[Co2(BDC)2(BPNO)]*H2BDC*2MeOH	[19]	MOF	0.399493	62.5907	0.0261568	1.25506	209.395	0.0192258	0.0~0.1
M-5	[Co3(ndc)-(HCOO)3(mu3-OH)(H2O)]n	[15]	MOF	0.731015	393.723	0.164538	1.5172	467.574	0.0736689	0.1~0.2
M-6	[Cu(INA)2(NH3)2(H2O)2]	[35]	MOF	0.179344	14.6483	0.00612155	1.06402	110.159	0.00306368	0.7~0.8
M-7	[Cu(INA)2]	[35]	MOF	0.389046	46.417	0.0193978	1.21599	160.283	0.0130943	0.5~0.6
M-8	[Cu(INAIP)]*2H2O	[92]	MOF	0.674094	274.037	0.114521	1.58	678.747	0.114109	0.0~0.1
M-9	[Cu2(H2btp)(H2O)2(12-bis(4-pyridl)ethylene)]	[114]	MOF	0.550283	104.917	0.0438451	1.41323	283.581	0.037726	0.9~1.0
M-10	[Cu2(H2btp)(H2O)2(13-bis(4-pyridl)propane)]	[114]	MOF	0.48852	87.4607	0.0365501	1.33136	241.248	0.0275837	0.0~0.1
M-11	[Cu2(H2btp)(H2O)2(bipyridine)]	[114]	MOF	0.452412	64.2397	0.026846	1.29233	196.822	0.0203554	0.0~0.1
M-12	[Cu2(pzdc)2(pyz)]*2H2O}	[30]	MOF	0.524157	111.602	0.0466387	1.51305	442.896	0.0670979	0.0~0.1
M-13	[Mn(mpto)2.CH3CH2OH]2	[24]	MOF	0.0612267	4.4173	0.001846	1.00138	95.9887	6.20284e-05	0.4~0.5
M-14	[Ni(dipn)]2[Ni(dipn)(H2O)][Fe(CN)6]2.2H2O	[66]	MOF	0.620637	167.09	0.0698274	1.47582	381.762	0.0562689	0.9~1.0
M-15	[Ni(pca)(bdc)0.5(H2O)2]	[58]	MOF	0.561909	115.612	0.0483147	1.38426	270.945	0.034461	0.0~0.1
M-16	[Ni8(L5)6]	[6]	MOF	0.563992	97.0988	0.0405779	1.30572	197.003	0.0212461	0.6~0.7
M-17	[Ni8(L5-CF3)6]	[6]	MOF	1.26901e-11	9.26151e-10	3.87041e-13	1	106.666	0	0.8~0.9
M-18	[Ni8(L5-CH3)6]	[106]	MOF	0.04403	3.40071	0.00142117	1.00139	107.721	6.99653e-05	0.6~0.7
M-19	[PbL2]*2DMF*6H2O	[98]	MOF	0.516777	83.2736	0.0348003	1.27936	193.994	0.0195897	0.9~1.0
M-20	[PbL2]*DMF*2H2O	[98]	MOF	0.379375	48.6517	0.0203317	1.35419	236.182	0.0275621	0.0~0.1
M-21	[Zn(NO2-BDC)(dmbpy).5](C2H6O)(H2O)	[47]	MOF	0.336779	35.0914	0.0146648	1.17117	141.132	0.00956869	0.4~0.5
M-22	[Zn2(ip)2(bpy)2]*DMF}n	[87]	MOF	0.425916	55.7065	0.0232799	1.18587	147.956	0.0105827	0.2~0.3
M-23	[Zn3(TCPB)2*2H2O]*2H2O*4DMF	[10]	MOF	0.622344	132.443	0.0553482	1.44095	301.807	0.0430209	0.1~0.2
M-24	[Zn4O(mipcapz)3]n on [Zn4O(dmcapz)3]n	[1]	MOF	0.198039	16.4036	0.00685513	1.00226	95.4806	0.00010119	0.7~0.8
M-25	{(H2PIP)0.5[VO(CEP)]*H2O}	[56]	MOF	0.54436	94.2724	0.0393967	1.04661	106.693	0.00218911	0.2~0.3
M-26	{[Cu(azpy)(glut)](H2O)2}	[50]	MOF	0.639252	147.164	0.0615001	1.13267	129.362	0.00708086	0.2~0.3
M-27	{[Cu2(4-pmpmd)2(CH3OH)4(opd)2]*2H2O}	[52]	MOF	0.374552	42.9962	0.0179682	1.00794	99.2364	0.000366364	0.3~0.4
M-28	{[Cu2(pzdc)2(bpy)]*4H2O}	[30]	MOF	0.645138	267.35	0.111726	1.59286	751.558	0.125711	0.0~0.1
M-29	{[Dy(ox)(Bpybc)(H2O)]*OH*13H2O}n	[102]	MOF	0.658327	179.581	0.0750475	1.49113	371.196	0.056196	0.5~0.6
M-30	{[Ni(bpe)2(N(CN)2)](N(CN)2)}n	[86]	MOF	0.465386	67.7916	0.0283303	1.26831	186.92	0.0181873	0.0~0.1
M-31	{[Zn-(C10H2O8)0.5(C10S2N2H8)]*5H2O]}n	[60]	MOF	0.536992	103.18	0.0431194	1.43603	314.936	0.0433403	0.0~0.1
M-32	{[Zn(oxo-pba)2(bpy)]4H2O}n	[116]	MOF	0.312702	32.1682	0.0134432	1.19816	152.417	0.011493	0.9~1.0
M-33	{[Zn2(bpdc)2(azpy)]*2H2O*2DMF}n	[61]	MOF	0.325753	34.3995	0.0143757	1.15873	138.798	0.00861164	0.5~0.6
M-34	{[Zn2(bpdc)2(azpy)]*2H2O*2DMF}n Nanoscale	[61]	MOF	0.43264	58.0451	0.0242572	1.28338	190.084	0.0189933	0.7~0.8
M-35	{[Zn3(bpdc)3(azpy)]*4H2O*2DEF}n	[61]	MOF	0.445533	61.0472	0.0255118	1.25027	178.351	0.0164338	0.8~0.9
M-36	{[Zn4O(bfbpdc)3-(bpy)0.5(H2O)]*(3DMF)(H2O)}n	[59]	MOF	0.0611068	4.29005	0.00179283	1.05914	108.174	0.00268527	0.8~0.9
M-37	{[ZnL(HCO2)(H2O)]*DMF}	[108]	MOF	0.65409	163.944	0.0685127	1.47819	345.444	0.0516026	0.4~0.5
M-38	1 C76H116N14O42Zn3	[117]	MOF	0.613989	155.633	0.0650397	1.41572	299.302	0.0401016	0.9~1.0
M-39	1-LiCl	[111]	MOF	0.73283	371.075	0.155073	1.56522	579.247	0.0969586	0.1~0.2
M-40	2D [Cu(bpy)2(OTf)2]n	[69]	MOF	0.65238	177.082	0.074003	1.46127	341.279	0.0497588	0.1~0.2
M-41	Blucher-101408	[106]	MOF	8.82682e-05	0.00591134	2.47037e-06	1.14098	131.724	0.00719205	0.7~0.8
M-42	Bu-FeCr	[111]	MOF	0.233297	21.1651	0.00884498	1.05622	110.143	0.00272373	0.8~0.9
M-43	C10H4O12Eu2	[90]	MOF	0.561362	130.351	0.054474	1.38717	287.553	0.0363943	0.0~0.1
M-44	C115.5H202N14O43Zn4	[91]	MOF	0.312567	36.8335	0.0153928	1.09069	119.753	0.00337146	0.0~0.1
M-45	C11H15BrN2O4Zn	[72]	MOF	0.424273	57.2374	0.0239197	1.31502	210.797	0.0229409	0.0~0.1
M-46	C11H15ClN2O4Zn	[72]	MOF	0.480326	68.9532	0.0288158	1.21144	155.822	0.012382	0.4~0.5
M-47	C12H17ClN2O3Cd	[51]	MOF	0.080413	5.70831	0.00238552	1.00362	95.755	0.000161326	0.8~0.9
M-48	C15H27N2O10Dy	[53]	MOF	0.569425	136.385	0.0569959	1.51555	448.153	0.0688646	0.0~0.1
M-49	C15H27N2O10Er	[53]	MOF	0.43341	77.2576	0.0322862	1.19435	165.385	0.00930817	0.0~0.1
M-50	C15H27N2O10Ho	[53]	MOF	0.610417	168.214	0.070297	1.50436	432.295	0.0658758	0.0~0.1
M-51	C15H27N2O10Tb	[53]	MOF	0.645141	219.152	0.0915841	1.52996	501.468	0.0791176	0.0~0.1
M-52	C15H27N2O10Tm	[53]	MOF	0.561666	119.602	0.049982	1.24773	180	0.0150384	0.0~0.1
M-53	C18H21Br2N4O9Cd2	[51]	MOF	0.285396	28.5913	0.0119484	1.14346	135.493	0.00781964	0.0~0.1
M-54	C24H40N2O16Cl2Cd3	[37]	MOF	0.557909	117.194	0.0489757	1.45918	345.867	0.0493931	0.0~0.1
M-55	C26H24Br2Cu2N8O3	[101]	MOF	0.442522	77.7224	0.0324804	1.48661	414.479	0.0601807	0.0~0.1
M-56	C28H24CoN10	[93]	MOF	0.405481	49.9507	0.0208746	1.27535	183.88	0.0180612	0.7~0.8
M-57	C32H24Cu3N6O12	[13]	MOF	0.693615	291.695	0.1219	1.60213	705.323	0.121405	0.1~0.2
M-58	C32H46N4O8Zn	[100]	MOF	0.0651933	4.58005	0.00191401	1.02542	100.589	0.00113948	0.6~0.7
M-59	C4H8HoKO12 Dehydrated	[54]	MOF	0.605871	255.394	0.10673	1.60265	946.353	0.159291	0.0~0.1
M-60	C55H52Fe4N20O18	[32]	MOF	0.605207	162.461	0.0678931	1.53445	470.86	0.0738089	0.0~0.1
M-61	C62H44N2O8Zn2	[57]	MOF	0.377076	42.8724	0.0179165	1.05598	112.253	0.00277618	0.9~1.0
M-62	C62H50Cd3K2N2O26	[105]	MOF	0.597921	135.465	0.0566111	1.42401	293.705	0.0397043	0.2~0.3
M-63	C9H11ClN2O4Cd	[51]	MOF	0.642515	185.637	0.0775782	1.51101	435.491	0.0678579	0.1~0.2
M-64	CALF-25	[73]	MOF	0.175323	14.6732	0.00613196	1.0422	107.185	0.00185805	0.7~0.8
M-65	CAU-10-CH3	[111]	MOF	0.394466	47.6211	0.019901	1.28602	188.271	0.0189628	0.4~0.5
M-66	CAU-10-H	[111]	MOF	0.668285	721.49	0.301513	1.33094	261.36	0.0300456	0.1~0.2
M-67	CAU-10-NH2	[111]	MOF	0.706981	357.858	0.14955	1.58702	669.565	0.11227	0.0~0.1
M-68	CAU-10-NO2	[111]	MOF	0.547227	96.3497	0.0402648	1.0529	109.04	0.00257306	0.3~0.4
M-69	CAU-10-OCH3	[111]	MOF	0.689339	174.754	0.0730302	1.13771	131.653	0.0074419	0.2~0.3
M-70	CAU-10-OH	[111]	MOF	0.766148	512.404	0.214135	1.62944	881.027	0.158249	0.1~0.2
M-71	CAU-10-pydc	[2]	MOF	0.752924	741.535	0.30989	1.6776	1598.48	0.295274	0.0~0.1
M-72	CAU-13	[62]	MOF	0.680721	230.255	0.0962242	1.18706	153.177	0.0111284	0.2~0.3
M-73	CAU-1-NH2	[97]	MOF	0.165556	13.88	0.0058005	1.00101	99.8154	4.06833e-05	0.4~0.5
M-74	CAU-1-NHCH3	[97]	MOF	0.591764	124.414	0.0519931	1.40515	269.808	0.0351852	0.3~0.4
M-75	CAU-1-NHCOCH3	[97]	MOF	0.675927	245.418	0.102561	1.44368	341.329	0.0476009	0.2~0.3
M-76	Cd (II)-MOF [Cd(L)(DMF)]	[112]	MOF	0.611672	167.549	0.0700193	1.53209	467.329	0.0732604	0.0~0.1
M-77	CID-3	[89]	MOF	0.00134923	0.0898216	3.75367e-05	1.00106	97.156	8.88008e-08	0.5~0.6
M-78	Cobalt Triazolyl Phosphonate MOF	[115]	MOF	0.726552	395.13	0.165126	1.6283	874.358	0.15495	0.0~0.1
M-79	Cobalt Triazolyl Phosphonate MOF (95%RH)	[115]	MOF	0.695557	337.611	0.141089	1.61644	850.887	0.148086	0.0~0.1
M-80	Cobalt Triazolyl Phosphonate MOF (Activated at 403K)	[115]	MOF	0.758788	347.498	0.14522	1.58772	552.241	0.0941435	0.0~0.1
M-81	Co-MOF-74(M)	[27]	MOF	0.669806	676.576	0.282743	1.69077	2630.85	0.479417	0.0~0.1
M-82	Co-MOF-74(S)	[27]	MOF	0.705606	1112.86	0.465069	1.69611	3381.15	0.620547	0.0~0.1
M-83	CPO-27-Ni	[99]	MOF	0.60588	387.759	0.162046	1.66199	1746.28	0.305928	0.0~0.1
M-84	Cr-MIL(101)	[111]	MOF	0.758812	342.531	0.143145	1.56375	506.637	0.084977	0.4~0.5
M-85	Cr-MIL-101-NO2	[111]	MOF	0.673482	183.479	0.0766765	1.45873	319.408	0.0461706	0.4~0.5
M-86	CuBTC	[42]	MOF	0.735045	584.643	0.244324	1.6788	1340.25	0.243723	0.0~0.1
M-87	Cu-MOF	[84]	MOF	0.214696	24.468	0.0102253	1.28528	225.839	0.02071	0.0~0.1
M-88	DETA-MIL-101	[96]	MOF	0.487003	77.591	0.0324255	1.31587	209.592	0.022281	0.0~0.1
M-89	DMOF-Cl2	[82]	MOF	0.236039	21.0751	0.00880735	1.11916	124.885	0.00608977	0.3~0.4
M-90	DMOF-NO2	[82]	MOF	0.495875	79.2773	0.0331302	1.38814	262.091	0.0334121	0.4~0.5
M-91	DMOF-OH	[82]	MOF	0.461987	64.8307	0.027093	1.21051	158.843	0.0127595	0.9~1.0
M-92	DUT-10(Zn)	[18]	MOF	0.252522	22.5545	0.0094256	1.01579	98.3964	0.000715129	0.9~1.0
M-93	DUT-4	[40]	MOF	0.0290694	2.0537	0.000858246	1.00061	100.19	2.84954e-05	0.9~1.0
M-94	DUT-67	[74]	MOF	0.792504	672.065	0.280858	1.59319	612.802	0.103999	0.2~0.3
M-95	ED-ZIF-8	[3]	MOF	0.0329118	2.22294	0.000928974	1.00422	95.9307	0.000179437	0.4~0.5
M-96	Et-MnCr	[111]	MOF	0.60309	125.312	0.0523681	1.1332	132.063	0.00721448	0.2~0.3
M-97	HKUST-1-F	[11]	MOF	0.755103	416.33	0.173986	1.69243	1004.84	0.185871	0.9~1.0
M-98	JUC-110	[95]	MOF	0.561362	130.351	0.054474	1.38717	287.553	0.0363943	0.0~0.1
M-99	Lanthanum Triazolyl Phosphonate MOF	[115]	MOF	0.751593	489.896	0.204729	1.39803	297.408	0.0390288	0.2~0.3
M-100	Me-FeCr	[111]	MOF	0.290873	31.1644	0.0130237	1.00756	101.856	0.00035782	0.5~0.6
M-101	MFU-4	[88]	MOF	0.800579	711.706	0.297424	1.5904	638.089	0.110196	0.1~0.2
M-102	Mg-CPO-27	[111]	MOF	0.741322	986.779	0.412378	1.68448	2094.14	0.379422	0.0~0.1
M-103	Mg-MOF-74©	[94]	MOF	0.623593	459.728	0.192122	1.65628	1918.85	0.339082	0.0~0.1
M-104	MIL-100	[36]	MOF	0.751423	390.325	0.163118	1.31477	225.903	0.0251819	0.2~0.3
M-105	MIL-100(Cr)	[49]	MOF	0.55154	172.454	0.0720692	1.45499	471.798	0.0668739	0.6~0.7
M-106	MIL-100(Cr)-DEG	[33]	MOF	0.704525	257.308	0.10753	1.2874	210.027	0.0218198	0.3~0.4
M-107	MIL-100(Cr)-EG	[33]	MOF	0.710925	264.512	0.110541	1.28705	210.5	0.0218755	0.3~0.4
M-108	MIL-100(Cr)-EN	[33]	MOF	0.721458	281.262	0.11754	1.35401	254.754	0.030984	0.2~0.3
M-109	MIL-100(Cr)-TEG	[33]	MOF	0.694062	210.992	0.0881741	1.32566	215.628	0.0242929	0.3~0.4
M-110	MIL-100(Fe)	[40]	MOF	0.723915	363.329	0.151836	1.16855	184.238	0.0115241	0.3~0.4
M-111	MIL-101-NH2	[41]	MOF	0.613488	125.789	0.0525677	1.21101	156.114	0.0126468	0.3~0.4
M-112	MIL-101-SO3H	[41]	MOF	0.788789	637.357	0.266354	1.60117	648.129	0.110145	0.3~0.4
M-113	MIL-125	[28]	MOF	0.340314	36.5308	0.0152663	1.12067	126.846	0.0063142	0.3~0.4
M-114	MIL-125-NH2	[111]	MOF	0.792109	748.321	0.312726	1.55474	560.577	0.0929517	0.1~0.2
M-115	MIL-160	[2]	MOF	0.753455	790.4	0.330311	1.67283	1674.86	0.309122	0.0~0.1
M-116	MIL-163	[8]	MOF	0.495413	89.396	0.0373588	1.50098	383.638	0.0574309	0.9~1.0
M-117	MIL-53(Al)ht	[104]	MOF	0.640446	178.195	0.0744681	1.49107	402.771	0.061554	0.1~0.2
M-118	MIL-53(Al)it	[104]	MOF	0.458697	61.1232	0.0255435	1.21678	157.563	0.0129485	0.6~0.7
M-119	MIL-53(Cr)	[67]	MOF	0.650226	150.175	0.0627587	1.47818	331.013	0.0493049	0.9~1.0
M-120	NBu4	[111]	MOF	0.0826254	5.95254	0.00248758	1.03228	102.458	0.0014404	0.0~0.1
M-121	NENU-11	[68]	MOF	0.395302	49.3995	0.0206442	1.22661	168.244	0.0144166	0.1~0.2
M-122	Ni3C87H118N12O29	[55]	MOF	0.663712	188.049	0.0785864	1.41342	296.462	0.0401401	0.7~0.8
M-123	Ni-DOBDC	[80]	MOF	0.635616	403.254	0.168521	1.73817	2275.31	0.429907	0.0~0.1
M-124	Pip-CPO-27-Ni	[99]	MOF	0.510285	159.155	0.0665115	1.54591	721.548	0.111846	0.0~0.1
M-125	PIZOF-2	[74]	MOF	0.00314804	0.211018	8.81852e-05	1.00272	98.1719	0.000116444	0.7~0.8
M-126	pretreated a-Al	[113]	MOF	0.180801	14.9178	0.00623418	1.03685	103.385	0.00168467	0.1~0.2
M-127	pretreated m-Al	[113]	MOF	0.159868	12.8017	0.00534987	1.03898	103.865	0.00177006	0.1~0.2
M-128	SIM-1	[111]	MOF	0.631059	153.102	0.0639817	1.2465	176.992	0.0163255	0.2~0.3
M-129	S-MIL-53(Al)	[39]	MOF	0.165187	13.0925	0.0054714	1.00041	95.0874	1.82938e-05	0.8~0.9
M-130	SNU-80	[14]	MOF	0.0312874	2.1348	0.000892139	1.00408	97.1415	0.000183542	0.0~0.1
M-131	TAF-1a	[16]	MOF	0.129963	10.0129	0.00418441	1.0351	103.776	0.00163101	0.0~0.1
M-132	Ti(pyradine-2-carboxylic acid)	[11]	MOF	0.641086	155.507	0.0649868	1.04854	108.479	0.00214336	0.2~0.3
M-133	UiO-66	[74]	MOF	0.681997	198.908	0.0831244	1.36653	245.663	0.0306007	0.3~0.4
M-134	UiO-66(Zr)-(COOH)2	[5]	MOF	0.684398	250.158	0.104542	1.52192	461.842	0.0725401	0.0~0.1
M-135	UiO-66(Zr4+) with high concentration stearic acid	[46]	MOF	0.768206	558.209	0.233277	1.56936	561.411	0.0917676	0.3~0.4
M-136	UiO-66(Zr4+) with metal/ligand ratio 6:3	[46]	MOF	0.749446	370.099	0.154666	1.4668	386.182	0.056662	0.3~0.4
M-137	UiO-66-NH2	[63]	MOF	0.77202	755.734	0.315824	1.63782	1015.14	0.181998	0.1~0.2
M-138	UMCM-1	[63]	MOF	0.623632	136.127	0.0568878	1.41473	274.998	0.0371731	0.7~0.8
M-139	untreated a-Al	[113]	MOF	0.0789244	5.70486	0.00238408	1.04259	105.079	0.00193908	0.0~0.1
M-140	untreated m-Al	[113]	MOF	0.209033	17.9415	0.00749782	1.03588	103.352	0.00167947	0.1~0.2
M-141	Y-fum-fcu-MOF	[7]	MOF	0.772717	741.817	0.310007	1.67152	1367.8	0.253328	0.0~0.1
M-142	ZIF-8	[57]	MOF	0.000267359	0.0174661	7.29913e-06	1	95.4531	9.27175e-08	0.9~1.0
M-143	Zn(II)-MOF [Zn(HPylmDC)(DMA)]n	[123]	MOF	0.399305	52.448	0.0219182	1.32265	215.548	0.0234272	0.0~0.1
M-144	Zn(L)(tdca)*1.5DMF	[118]	MOF	0.542634	102.404	0.042795	1.34853	236.126	0.0279661	0.0~0.1
M-145	Zn(NDI-H)	[109]	MOF	0.0017642	0.12123	5.06625e-05	1	100.178	5.17075e-10	0.4~0.5
M-146	Zn(NDI-NHEt)	[109]	MOF	0.153024	12.778	0.00533997	1.00307	101.572	0.000145678	0.4~0.5
M-147	Zn(NDI-SEt)	[111]	MOF	0.712149	292.71	0.122324	1.40256	305.598	0.0408518	0.1~0.2
M-148	Zn(NDI-SO2Et)	[111]	MOF	0.626913	144.142	0.0602372	1.3254	212.843	0.0239854	0.3~0.4
M-149	Zn(NDI-SOEt)	[111]	MOF	0.712149	292.71	0.122324	1.40256	305.598	0.0408518	0.1~0.2
M-150	Zn(NO3)2*6H2O	[12]	MOF	0.690654	335.973	0.140404	1.60311	775.07	0.132704	0.0~0.1
M-151	Zn2C14N2O8H4	[65]	MOF	0.71217	269.974	0.112823	1.49219	391.762	0.0600891	0.1~0.2
M-152	Zn3(TCPB)2(H2O)2	[107]	MOF	0.415366	52.0532	0.0217532	1.16583	143.37	0.0094519	0.9~1.0
M-153	Zn4O(dmcapz)3	[71]	MOF	2.64348e-05	0.00176106	7.35954e-07	1.12137	123.877	0.00592454	0.8~0.9
M-154	Zn-BTTB-DMBPY	[83]	MOF	0.139547	10.9793	0.0045883	1.00017	95.0398	7.74983e-06	0.8~0.9
M-155	Zn-MOF-74(cycle 1)	[48]	MOF	0.59173	230.85	0.0964728	1.61078	856.131	0.141768	0.0~0.1
M-156	Zr-MOF-801-P	[74]	MOF	0.756008	685.79	0.286594	1.6579	1337.33	0.244304	0.0~0.1
M-157	Zr-MOF-801-SC	[74]	MOF	0.755999	514.562	0.215037	1.63613	939.848	0.168879	0.0~0.1
M-158	Zr-MOF-802	[74]	MOF	0.53668	100.068	0.0418187	1.41335	285.81	0.038016	0.0~0.1
M-159	Zr-MOF-804	[74]	MOF	0.484122	75.3455	0.0314871	1.12283	135.034	0.00647063	0.4~0.5
M-160	Zr-MOF-805	[74]	MOF	0.698957	235.229	0.0983027	1.1569	146.281	0.00926486	0.3~0.4
M-161	Zr-MOF-806	[74]	MOF	0.70793	400.956	0.167561	1.60571	824.145	0.141769	0.0~0.1
M-162	Zr-MOF-808	[74]	MOF	0.652472	180.96	0.0756236	1.44607	313.974	0.0436045	0.3~0.4
M-163	Zr-MOF-841	[74]	MOF	0.839295	958.555	0.400583	1.28731	190.595	0.0194949	0.2~0.3
O-1	HMn8O16	[21]	Metal oxide	0.335593	40.2007	0.0168	1.23976	185.908	0.0164323	0.0~0.1
O-2	Na0.21H3.49Mn12O23	[21]	Metal oxide	0.367972	44.0271	0.0183991	1.286	195.006	0.0195842	0.0~0.1
O-3	AOP-CH2	[81]	MOP	0.380656	52.072	0.021761	1.00636	116.905	0.000346542	0.8~0.9
O-4	H[Ce(H2O)4]2[MnV13O38]*9NMP*17H2O	[103]	POM	0.498387	85.6223	0.0357818	1.45233	313.102	0.0435091	0.0~0.1
S-1	0.1TPABr-0.05Na20-SiO2-40H2O	[44]	Silicic	0.21612	19.0264	0.00795118	1.11383	124.852	0.00586535	0.0~0.1
S-2	0.1TPAOH-SiO2-40H20	[44]	Silicic	0.25263	24.4253	0.0102074	1.12615	131.785	0.00671845	0.8~0.9
S-3	0.36TPAOH-0.39HF-SIO2-34H20	[44]	Silicic	0.0156036	1.03245	0.000431464	1.00909	96.9732	0.000408046	0.7~0.8
S-4	Grade 03 Silica Gel	[75]	Silicic	0.719112	319.937	0.133703	1.55673	524.725	0.0855507	0.0~0.1
S-5	Silica Gel	[36]	Silicic	0.722675	303.951	0.127022	1.58417	563.582	0.0949651	0.1~0.2
S-6	Silicalite MFI	[45]	Silicic	0.224772	20.1347	0.00841435	1.10569	124.061	0.00549056	0.0~0.1
S-7	TPABr	[44]	Silicic	0.156007	12.7411	0.00532456	1.19663	149.094	0.0109313	0.0~0.1
S-8	TPAOH	[44]	Silicic	0.202757	18.4371	0.00770492	1.08877	119.284	0.00396637	0.0~0.1
S-9	TPAOH/HF	[44]	Silicic	0.00440857	0.289719	0.000121074	1.00116	95.82	4.87823e-05	0.8~0.9
S-10	ZSM-5	[64]	Silicic	0.0855025	6.231	0.00260395	1.00946	97.3853	0.000303833	0.3~0.4
S-11	HKUST-1 replica	[17]	Silicic	0.468884	70.974	0.0296603	1.40204	259.569	0.0333314	0.0~0.1
Z-1	CBV-901	[76]	Zeolite	0.000228861	0.0148803	6.21854e-06	1.00015	95.0328	6.33235e-06	0.0~0.1
Z-2	H0.34Na0.06Al0.4Si47.6O96	[21]	Zeolite	0.618597	139.317	0.0582209	1.39185	269.778	0.035217	0.8~0.9
Z-3	HiSiv 3000 Zeolite	[75]	Zeolite	0.328774	38.0481	0.0159004	1.17807	151.278	0.0103146	0.0~0.1
Z-4	K6Na6Al12O48	[21]	Zeolite	0.389271	97.1089	0.0405821	1.58435	883.198	0.139446	0.0~0.1
Z-5	MCM-41	[49]	Zeolite	0.0201067	1.47067	0.000614595	1.00019	104.53	9.2569e-06	0.7~0.8
Z-6	Na-ZSM-5	[49]	Zeolite	0.59173	230.85	0.0964728	1.61078	856.131	0.141768	0.0~0.1
Z-7	Zeolite 13X	[42]	Zeolite	0.757504	643.525	0.268931	1.65799	1365.77	0.251087	0.0~0.1
Z-8	Zeolite 4A	[78]	Zeolite	0.542633	209.061	0.0873673	1.54047	805.201	0.124692	0.0~0.1
Z-9	Zeolite Na-A	[120]	Zeolite	0.619744	308.364	0.128866	1.63734	1228.54	0.21387	0.0~0.1
Z-10	Zn2(pbc)2*Hdma*H3O*2H2O	[9]	Zeolite	0.606618	155.644	0.0650442	1.46125	351.819	0.0504259	0.0~0.1
a Calculated according to adsorption isotherms at 298 K.
